# Supplementary material for: Assessing the Seasonal and Spatial Dynamics of Zooplankton through DNA Metabarcoding in a Temperate Estuary
Source: Animals (Basel). 2023 Dec 16;13(24):3876. doi: 10.3390/ani13243876 (PMC10740712; doi:10.3390/ani13243876)
Supplement: Supplementary file 1 [file animals-13-03876-s001.zip › Moutinho et al_Supplementary_Material.xlsx]

## Sheet: Table S1
Table S1. Measured physical and chemical parameters at each sampling event, and the specific coordinates for each sampling site.
Water Parameters	LMZ1			LMZ2			LMZ3			LMZ4
	41°41'47.29"N 8°46'28.90"W			41°41'31.39"N 8°47'48.49"W			41°41'33.18"N 8°49'15.25"W			41°40'43.85"N 8°50'38.78"W
	Sum	Aut	Spr	Sum	Aut	Spr	Sum	Aut	Spr	Sum	Aut	Spr
Salinity	30.3	25.4	20.1	34	30.1	23.8	32.6	28.4	26.8	-	26	32
Conductivity (mS/cm)	43.2	37.1	33.3	47.9	43.3	38.9	46.2	41.1	43.3	-	37.9	50.6
pH	8.04	8	7.96	8.04	8.02	8	7.93	8.02	8.01	-	7.95	8.02

## Sheet: Table S2
Table S2. Nanodrop results regarding DNA concentrations of all zooplankton samples.
Sample	ng/µL	A260/A280	A260/A230
LMZ1A1	81.8	1.83	2.27
LMZ1A2	51	1.82	2.14
LMZ1A3	43.6	1.84	2.19
LMZ1B1	134	1.83	2.29
LMZ1B2	138.4	1.84	2.32
LMZ1B3	136.5	1.84	2.34
LMZ1C1	51.5	1.82	2.28
LMZ1C2	44.8	1.87	2.24
LMZ1C3	47.8	1.84	2.05
LMZ2A1	51.3	1.83	2.12
LMZ2A2	112.3	1.84	2.36
LMZ2A3	92.2	1.83	2.28
LMZ2B1	63.5	1.85	2.31
LMZ2B2	72.4	1.83	2.13
LMZ2B3	44.7	1.84	2.23
LMZ2C1	44.8	1.84	2.12
LMZ2C2	54.3	1.83	2.09
LMZ2C3	41.9	1.83	1.94
LMZ3A1	84.6	1.83	2.3
LMZ3A2	72.3	1.84	2.21
LMZ3A3	28	1.77	2.15
LMZ3B1	96.8	1.84	2.34
LMZ3B2	124.1	1.85	2.33
LMZ3B3	43.2	1.84	2.17
LMZ3C1	15.5	1.92	1.71
LMZ3C2	24.7	1.85	1.88
LMZ3C3	27	1.91	2.3
LMZ4A1	38.5	1.84	2.03
LMZ4A2	70.9	1.85	2.28
LMZ4A3	52.6	1.82	2.02
LMZ4B1	21	1.84	1.93
LMZ4B2	16.3	1.83	2
LMZ4B3	21.7	1.82	1.94
LMZ4C1	5.3	1.97	1
LMZ4C2	10.8	1.92	1.29
LMZ4C3	5.4	2.17	1.49

## Sheet: Table S3
Table S3. Number of reads recovered from Illumina MiSeq sequencing and throughout the whole process of filtration, trimming, and taxonomic assignment until eligibility for analysis.
Marker	Point downstream-upstream	Season	Samples	No. of reads
				Sequenced	%	Filtered	%	Primers trimming	%	Usable reads	%	Taxonomic assigned	%	Metazoan	%	Species-level ID	%	Aquatic	%	Eligible Ids	%
COI	LMZ1	Summer	LMZ1A1	48939	1	47602	0.97268	39315	0.803347	36290	0.741535	22391	0.457529	22238	0.454402	13876	0.283537	13874	0.283496	13474	0.275322
			LMZ1A2	92072	1	82659	0.897765	66212	0.719133	62510	0.678925	35320	0.383613	34856	0.378573	24734	0.268638	24726	0.268551	24584	0.267008
			LMZ1A3	76103	1	65086	0.855236	51873	0.681616	48653	0.639305	29248	0.384321	28977	0.38076	16307	0.214275	16302	0.21421	16252	0.213553
		Autumn	LMZ1B1	65918	1	63821	0.968188	52574	0.797567	51692	0.784186	18395	0.279059	18332	0.278103	14595	0.221411	14590	0.221336	14549	0.220714
			LMZ1B2	80522	1	77739	0.965438	63561	0.789362	62051	0.770609	28579	0.354922	28468	0.353543	21661	0.269007	21661	0.269007	21619	0.268486
			LMZ1B3	48637	1	47112	0.968645	40554	0.83381	39936	0.821103	10313	0.21204	10257	0.210889	7551	0.155252	7549	0.155211	7489	0.153977
		Spring	LMZ1C1	46691	1	45187	0.967788	38301	0.820308	37316	0.799212	18615	0.398685	18528	0.396822	17711	0.379324	17706	0.379217	17657	0.378167
			LMZ1C2	74964	1	72786	0.970946	59418	0.79262	57884	0.772157	28098	0.37482	27831	0.371258	25064	0.334347	25037	0.333987	25005	0.33356
			LMZ1C3	46036	1	44541	0.967525	37284	0.809888	36349	0.789578	18944	0.411504	18672	0.405596	16889	0.366865	16887	0.366822	16840	0.365801
		Total		579882	1	546533	0.94249	449092	0.774454	432681	0.746154	209903	0.361975	208159	0.358968	158388	0.273138	158332	0.273042	157469	0.271554
	LMZ2	Summer	LMZ2A1	53406	1	49380	0.924615	37237	0.697244	36256	0.678875	21862	0.409355	21543	0.403382	12528	0.23458	12528	0.23458	12470	0.233494
			LMZ2A2	52144	1	50618	0.970735	41396	0.793878	39932	0.765802	26116	0.500844	25936	0.497392	11037	0.211664	11036	0.211645	10880	0.208653
			LMZ2A3	67165	1	64686	0.963091	51925	0.773096	49414	0.735711	33504	0.498831	33294	0.495705	16719	0.248924	16719	0.248924	16045	0.238889
		Autumn	LMZ2B1	81549	1	78685	0.96488	62155	0.76218	60639	0.74359	28293	0.346945	27967	0.342947	19075	0.233908	19069	0.233835	19018	0.233209
			LMZ2B2	51474	1	50048	0.972297	40168	0.780355	39317	0.763823	16293	0.316529	16216	0.315033	11491	0.223239	11486	0.223142	11417	0.221801
			LMZ2B3	41390	1	40185	0.970887	33365	0.806113	32592	0.787437	10834	0.261754	10731	0.259266	8468	0.20459	8466	0.204542	8415	0.20331
		Spring	LMZ2C1	64700	1	62623	0.967898	49501	0.765085	48604	0.751221	25989	0.401685	25126	0.388346	20876	0.322658	20874	0.322628	20850	0.322257
			LMZ2C2	74988	1	71968	0.959727	55014	0.733637	53785	0.717248	31518	0.420307	30714	0.409586	22768	0.303622	22760	0.303515	22683	0.302488
			LMZ2C3	29398	1	26827	0.912545	21972	0.747398	21387	0.727498	13882	0.472209	13036	0.443432	9370	0.318729	9369	0.318695	9304	0.316484
		Total		516214	1	495020	0.958943	392733	0.760795	381926	0.73986	208291	0.403497	204563	0.396276	132332	0.256351	132307	0.256303	131082	0.25393
	LMZ3	Summer	LMZ3A1	39899	1	38282	0.959473	30049	0.753127	27441	0.687762	18952	0.474999	18928	0.474398	9389	0.235319	9389	0.235319	8906	0.223214
			LMZ3A2	44750	1	41281	0.92248	31047	0.693788	28917	0.64619	17725	0.396089	17693	0.395374	10817	0.241721	10687	0.238816	9979	0.222994
			LMZ3A3	51843	1	46890	0.904462	36620	0.706363	34367	0.662905	24085	0.464576	24043	0.463766	11089	0.213896	11086	0.213838	10747	0.207299
		Autumn	LMZ3B1	62467	1	60990	0.976356	49557	0.793331	48920	0.783133	24465	0.391647	24438	0.391215	15682	0.251045	15680	0.251013	15628	0.25018
			LMZ3B2	48809	1	46855	0.959966	37529	0.768895	36662	0.751132	13634	0.279334	13629	0.279231	7713	0.158024	7713	0.158024	7679	0.157328
			LMZ3B3	53173	1	51535	0.969195	41492	0.780321	40565	0.762887	16507	0.31044	16484	0.310007	10754	0.202246	10754	0.202246	10730	0.201794
		Spring	LMZ3C1	73660	1	56082	0.761363	44286	0.601222	43581	0.591651	30310	0.411485	30249	0.410657	12319	0.167241	12133	0.164716	12086	0.164078
			LMZ3C2	34828	1	30473	0.874957	24290	0.697427	23886	0.685827	14628	0.420007	14497	0.416246	8120	0.233146	8106	0.232744	8006	0.229873
			LMZ3C3	58443	1	49008	0.838561	37963	0.649573	37222	0.636894	26318	0.450319	25908	0.443304	14343	0.245419	14120	0.241603	14044	0.240303
		Total		467872	1	421396	0.900665	332833	0.711376	321561	0.687284	186624	0.398878	185869	0.397265	100226	0.214217	99668	0.213024	97805	0.209042
	LMZ4	Summer	LMZ4A1	50122	1	44828	0.894378	35715	0.712561	32160	0.641634	22542	0.449743	22515	0.449204	13521	0.269762	13516	0.269662	13488	0.269103
			LMZ4A2	45753	1	43103	0.94208	33552	0.733329	30901	0.675387	21798	0.476428	21786	0.476165	14691	0.321094	14664	0.320504	14208	0.310537
			LMZ4A3	58734	1	56047	0.954251	45926	0.781932	42915	0.730667	27558	0.4692	27545	0.468979	17624	0.300065	17615	0.299911	17530	0.298464
		Autumn	LMZ4B1	57736	1	53557	0.927619	30190	0.522897	29416	0.509491	7332	0.126992	7095	0.122887	4135	0.0716191	4130	0.0715325	4079	0.0706492
			LMZ4B2	47885	1	44884	0.937329	25241	0.527117	24521	0.512081	6659	0.139062	6519	0.136139	4951	0.103394	4949	0.103352	4918	0.102704
			LMZ4B3	50450	1	49920	0.989495	35412	0.701923	34920	0.69217	9012	0.178632	8812	0.174668	6532	0.129475	6416	0.127175	6366	0.126184
		Spring	LMZ4C1	66812	1	66095	0.989268	55555	0.831512	55229	0.826633	21725	0.325166	21186	0.317099	3780	0.0565767	3780	0.0565767	3727	0.0557834
			LMZ4C2	65024	1	64318	0.989142	52810	0.812162	52426	0.806256	18100	0.278359	17452	0.268393	3498	0.0537955	3468	0.0533342	3421	0.0526113
			LMZ4C3	90508	1	89580	0.989747	73084	0.807487	72111	0.796736	37386	0.413068	37354	0.412715	12710	0.14043	12706	0.140385	12631	0.139557
		Total		533024	1	512332	0.96118	387485	0.726956	374599	0.702781	172112	0.322897	170264	0.31943	81442	0.152792	81244	0.152421	80368	0.150777
	TOTAL			2096992	1	1975281	0.941959	1562143	0.744945	1510767	0.720445	776930	0.370497	768855	0.366647	472388	0.225269	471551	0.22487	466724	0.222568
18S	LMZ1	Summer	LMZ1A1	60215	1	59770	0.99261	44932	0.746193	33657	0.558947	26511	0.440272	25910	0.430291	24338	0.404185	24338	0.404185	24215	0.402142
			LMZ1A2	54769	1	51461	0.939601	36439	0.665322	19569	0.357301	15730	0.287206	14671	0.267871	13522	0.246891	13437	0.24534	13246	0.241852
			LMZ1A3	90416	1	86315	0.954643	64023	0.708094	32944	0.36436	26814	0.296563	25042	0.276964	23254	0.257189	23250	0.257145	23081	0.255276
		Autumn	LMZ1B1	30072	1	29195	0.970837	22726	0.75572	9519	0.31654	7647	0.25429	4965	0.165104	4844	0.16108	4844	0.16108	4755	0.158121
			LMZ1B2	26951	1	26676	0.989796	20687	0.767578	9622	0.357018	7706	0.285926	4788	0.177656	4579	0.169901	4579	0.169901	4490	0.166599
			LMZ1B3	36036	1	34211	0.949356	26495	0.735237	12626	0.350372	10509	0.291625	6462	0.179321	6379	0.177017	6379	0.177017	6287	0.174464
		Spring	LMZ1C1	34555	1	34318	0.993141	20259	0.586283	10914	0.315844	8422	0.243727	6825	0.197511	6476	0.187411	6474	0.187353	6413	0.185588
			LMZ1C2	35669	1	35437	0.993496	19502	0.546749	10146	0.284449	7460	0.209145	5759	0.161457	5653	0.158485	5637	0.158036	5585	0.156579
			LMZ1C3	41911	1	41568	0.991816	20952	0.499916	8828	0.210637	6226	0.148553	5655	0.134929	5218	0.124502	5217	0.124478	5154	0.122975
		Total		410594	1	398951	0.971644	276015	0.672233	147825	0.360027	117025	0.285014	100077	0.243737	94263	0.229577	94155	0.229314	93226	0.227052
	LMZ2	Summer	LMZ2A1	61229	1	60023	0.980303	47021	0.767953	32614	0.532656	22738	0.37136	20125	0.328684	15780	0.257721	15780	0.257721	15691	0.256267
			LMZ2A2	14978	1	14896	0.994525	10673	0.712578	8202	0.547603	3212	0.214448	2294	0.153158	2024	0.135132	2024	0.135132	1904	0.12712
			LMZ2A3	29354	1	29201	0.994788	22977	0.782755	18324	0.624242	14392	0.490291	10053	0.342475	9689	0.330074	9689	0.330074	9580	0.326361
		Autumn	LMZ2B1	27855	1	27331	0.981188	18720	0.672052	12817	0.460133	10448	0.375085	5143	0.184635	4506	0.161766	4506	0.161766	4452	0.159828
			LMZ2B2	70875	1	68709	0.969439	48953	0.690695	37805	0.533404	30047	0.423944	13978	0.19722	13698	0.19327	13698	0.19327	13627	0.192268
			LMZ2B3	36771	1	36135	0.982704	25771	0.700851	16078	0.437247	13409	0.364662	4815	0.130946	4596	0.12499	4595	0.124963	4536	0.123358
		Spring	LMZ2C1	40195	1	39964	0.994253	16961	0.421968	11535	0.286976	8402	0.209031	6735	0.167558	6030	0.150019	6030	0.150019	5974	0.148625
			LMZ2C2	35484	1	35264	0.9938	12865	0.362558	6403	0.180448	3896	0.109796	3703	0.104357	3294	0.0928306	3294	0.0928306	3225	0.090886
			LMZ2C3	35214	1	34812	0.988584	10595	0.300875	6127	0.173993	4621	0.131226	3351	0.095161	2581	0.0732947	2581	0.0732947	2504	0.0711081
		Total		351955	1	346335	0.984032	214536	0.609555	149905	0.425921	111165	0.31585	70197	0.199449	62198	0.176721	62197	0.176719	61493	0.174718
	LMZ3	Summer	LMZ3A1	39684	1	39382	0.99239	27252	0.686725	23565	0.593816	18858	0.475204	17421	0.438993	16882	0.425411	16882	0.425411	16753	0.42216
			LMZ3A2	37850	1	37222	0.983408	25350	0.669749	20331	0.537147	15034	0.397199	13936	0.36819	13497	0.356592	13497	0.356592	13385	0.353633
			LMZ3A3	56486	1	51549	0.912598	36597	0.647895	28748	0.50894	22986	0.406933	21459	0.379899	20442	0.361895	20439	0.361842	20308	0.359523
		Autumn	LMZ3B1	52840	1	48660	0.920893	32661	0.618111	25938	0.490878	21542	0.407684	15713	0.297369	15521	0.293736	15520	0.293717	15428	0.291976
			LMZ3B2	52350	1	51538	0.984489	36737	0.701757	28687	0.547985	22354	0.427011	12491	0.238606	12171	0.232493	12171	0.232493	12095	0.231041
			LMZ3B3	38016	1	37387	0.983454	24687	0.649384	19716	0.518624	15762	0.414615	8603	0.226299	8203	0.215778	8203	0.215778	8130	0.213857
		Spring	LMZ3C1	44348	1	36847	0.83086	19236	0.433751	10891	0.24558	8525	0.19223	2883	0.0650086	1849	0.041693	1765	0.0397989	1749	0.0394381
			LMZ3C2	49954	1	42727	0.855327	18510	0.370541	14026	0.280778	9291	0.185991	6673	0.133583	2304	0.0461224	2300	0.0460424	2214	0.0443208
			LMZ3C3	43969	1	38236	0.869613	24431	0.555641	15387	0.349951	10911	0.248152	6927	0.157543	5062	0.115127	1909	0.043417	1858	0.042257
		Total		415497	1	383548	0.923107	245461	0.590765	187289	0.450759	145263	0.349613	106106	0.255371	95931	0.230883	92686	0.223073	91920	0.221229
	LMZ4	Summer	LMZ4A1	50664	1	40998	0.809214	21891	0.432082	17494	0.345294	15120	0.298437	13986	0.276054	13562	0.267685	13562	0.267685	13498	0.266422
			LMZ4A2	35711	1	35298	0.988435	25971	0.727255	20390	0.570973	13513	0.378399	10074	0.282098	9423	0.263868	9423	0.263868	9271	0.259612
			LMZ4A3	44820	1	43274	0.965506	26961	0.601539	22219	0.495739	18241	0.406983	17143	0.382485	16815	0.375167	16814	0.375145	16696	0.372512
		Autumn	LMZ4B1	44334	1	43846	0.988993	36667	0.827063	32145	0.725064	15358	0.346416	4134	0.0932467	3626	0.0817882	3625	0.0817657	3572	0.0805702
			LMZ4B2	43842	1	43452	0.991104	35637	0.812851	30468	0.69495	20748	0.473245	7024	0.160212	6669	0.152114	6669	0.152114	6594	0.150404
			LMZ4B3	50451	1	49281	0.976809	35484	0.703336	29859	0.591842	20395	0.404254	9139	0.181146	8867	0.175755	8867	0.175755	8795	0.174328
		Spring	LMZ4C1	28983	1	27751	0.957492	7996	0.275886	880	0.0303626	757	0.0261188	143	0.00493393	135	0.0046579	130	0.00448539	95	0.00327778
			LMZ4C2	41284	1	38381	0.929682	11431	0.276887	6982	0.169121	4192	0.101541	826	0.0200078	556	0.0134677	550	0.0133224	500	0.0121112
			LMZ4C3	30754	1	29129	0.947161	8147	0.264909	3946	0.128309	3188	0.103661	1080	0.0351174	1049	0.0341094	1044	0.0339468	988	0.0321259
		Total		370843	1	351410	0.947598	210185	0.566776	164383	0.443268	111512	0.300699	63549	0.171364	60702	0.163687	60684	0.163638	60009	0.161818
	TOTAL			1548889	1	1480244	0.955681	946197	0.610888	649402	0.41927	484965	0.313105	339929	0.219466	313094	0.202141	309722	0.199964	306648	0.197979

## Sheet: Table S4
Table S4. List of species and respective number of reads recovered with DNA metabarcoding from zooplankton samples using two molecular markers, COI and 18S. Non-indigenous species are marked with *.
Marker	Phylum	Class	Order	Family	Species	LMZ1A1	LMZ1A2	LMZ1A3	LMZ1B1	LMZ1B2	LMZ1B3	LMZ1C1	LMZ1C2	LMZ1C3	LMZ2A1	LMZ2A2	LMZ2A3	LMZ2B1	LMZ2B2	LMZ2B3	LMZ2C1	LMZ2C2	LMZ2C3	LMZ3A1	LMZ3A2	LMZ3A3	LMZ3B1	LMZ3B2	LMZ3B3	LMZ3C1	LMZ3C2	LMZ3C3	LMZ4A1	LMZ4A2	LMZ4A3	LMZ4B1	LMZ4B2	LMZ4B3	LMZ4C1	LMZ4C2	LMZ4C3
COI	Annelida	Clitellata	Tubificida	Naididae	Paranais litoralis																	9
	Annelida	Polychaeta	Amphinomida	Amphinomidae	Pareurythoe borealis															175								28
	Annelida	Polychaeta	Eunicida	Onuphidae	Diopatra micrura															954							396		765			112							125
	Annelida	Polychaeta	Phyllodocida	Nephtyidae	Aglaophamus agilis					11																	9
	Annelida	Polychaeta	Phyllodocida	Nephtyidae	Nephtys assimilis																													12
	Annelida	Polychaeta	Phyllodocida	Nephtyidae	Nephtys hombergii		35									45								31	59								34	284	33
	Annelida	Polychaeta	Phyllodocida	Nereididae	Platynereis dumerilii		16
	Annelida	Polychaeta	Phyllodocida	Phyllodocidae	Eumida taygete																				11
	Annelida	Polychaeta	Phyllodocida	Phyllodocidae	Phyllodoce mucosa		18																							99
	Annelida	Polychaeta	Phyllodocida	Polynoidae	Harmothoe clavigera	70		174							408	373	1351				21			137	305	242							130	1260	160
	Annelida	Polychaeta	Phyllodocida	Polynoidae	Harmothoe mariannae																													527
	Annelida	Polychaeta	Phyllodocida	Polynoidae	Polynoe scolopendrina	9										77
	Annelida	Polychaeta	Phyllodocida	Sigalionidae	Pholoe inornata	187	93	159							13	61	128				14	58	13	25	101	55				27	15	79	11	47			12	21
	Annelida	Polychaeta	Phyllodocida	Sigalionidae	Pisione puzae	333	492	188							152	150	1282							394	291	494							73	584	30
	Annelida	Polychaeta	Phyllodocida	Sigalionidae	Sthenelais boa																	396	19			52				42		31	218					24		12
	Annelida	Polychaeta	Phyllodocida	Tomopteridae	Tomopteris (Johnstonella) helgolandica			37							106	27	38							69	57	32							43	33	10
	Annelida	Polychaeta	Spionida	Spionidae	Pseudopolydora paucibranchiata*					9	11																			9		21					12
	Annelida	Polychaeta	Spionida	Spionidae	Spiophanes bombyx																	15										9
	Annelida	Polychaeta	Terebellida	Pectinariidae	Amphictene auricoma																	63
	Annelida	Polychaeta	Terebellida	Pectinariidae	Lagis koreni													26			11	19
	Annelida	Polychaeta	Terebellida	Terebellidae	Lanice conchilega				19		18	10	46	23					33		184	284	60							35		119								18
	Annelida	Polychaeta		Capitellidae	Capitella capitata										17		12								14	18
	Annelida	Polychaeta		Magelonidae	Magelona johnstoni							36	47	37							27	200	19						254	65		55
	Annelida	Polychaeta		Magelonidae	Magelona mirabilis																48
	Annelida	Polychaeta		Orbiniidae	Orbinia latreillii																	1737									137									366
	Annelida	Polychaeta		Oweniidae	Owenia fusiformis																10							17
	Annelida	Polychaeta		Polygordiidae	Polygordius appendiculatus			12																										10
	Annelida	Polychaeta		Sabellariidae	Sabellaria spinulosa			42							224												127		97						45
	Annelida		Sipuncula	Golfingiidae	Nephasoma (Nephasoma) rimicola					43																	83										218
	Arthropoda	Branchiopoda	Ctenopoda	Holopediidae	Holopedium gibberum		72	151		16						30	165		145						87								31
	Arthropoda	Branchiopoda	Ctenopoda	Sididae	Penilia avirostris				469	556	380							342	256	203							947	337	801							21	194
	Arthropoda	Branchiopoda	Onychopoda	Podonidae	Evadne nordmanni			12	237	656	106				71	13	589	406	187	251				80	65		268	462	517				13	14
	Arthropoda	Branchiopoda	Onychopoda	Podonidae	Pleopis polyphemoides											84	409														140			37
	Arthropoda	Branchiopoda	Onychopoda	Podonidae	Podon intermedius				34	63	9							57	22								13	22	31
	Arthropoda	Copepoda	Calanoida	Acartiidae	Acartia (Acartiura) clausi		11								50	11	21				15	13		21	21	17							9	12
	Arthropoda	Copepoda	Calanoida	Centropagidae	Centropages typicus				122				39	170				14	93										14
	Arthropoda	Copepoda	Calanoida	Clausocalanidae	Pseudocalanus elongatus	15		40	129	234	174	149	254	29	48	151	550	791	484	229	259	81	19	107	126	50	97	274	390	48		81		221	14		95	55		18	28
	Arthropoda	Copepoda	Calanoida	Paracalanidae	Paracalanus parvus																	14
	Arthropoda	Copepoda	Calanoida	Pseudodiaptomidae	Pseudodiaptomus marinus*			23	15	11										15																61
	Arthropoda	Copepoda	Calanoida	Temoridae	Temora longicornis	447	648	327	2657	4126	1899	2319	3388	1643	801	722	1105	4163	1816	1397	2715	4063	4172	846	876	561	1635	2465	2106	139	103	699	329	1036	1223	159	61	298	242	99	273
	Arthropoda	Copepoda	Calanoida	Temoridae	Temora stylifera																						11
	Arthropoda	Copepoda	Cyclopoida	Corycaeidae	Ditrichocorycaeus anglicus																							9
	Arthropoda	Copepoda	Harpacticoida	Ectinosomatidae	Pseudobradya minor	19		12							59
	Arthropoda	Copepoda	Harpacticoida	Harpacticidae	Harpacticus flexus					11	16				40		16	180			2153	499	44		72	19		15	32	38	122	40		31	41		45			196
	Arthropoda	Copepoda	Harpacticoida	Tachidiidae	Euterpina acutifrons								39																11										12
	Arthropoda	Malacostraca	Amphipoda	Caprellidae	Phtisica marina																												12
	Arthropoda	Malacostraca	Decapoda	Alpheidae	Athanas nitescens																	703
	Arthropoda	Malacostraca	Decapoda	Carcinidae	Carcinus maenas		58	111				93			680	18					663	758	113			283				38	37	212	43	74					59	54
	Arthropoda	Malacostraca	Decapoda	Crangonidae	Crangon crangon								11			27																			15
	Arthropoda	Malacostraca	Decapoda	Crangonidae	Philocheras trispinosus																									45
	Arthropoda	Malacostraca	Decapoda	Grapsidae	Pachygrapsus marmoratus								16																												9
	Arthropoda	Malacostraca	Decapoda	Hippolytidae	Hippolyte prideauxiana																												10
	Arthropoda	Malacostraca	Decapoda	Hippolytidae	Hippolyte varians																													12
	Arthropoda	Malacostraca	Decapoda	Palaemonidae	Palaemon longirostris																	33
	Arthropoda	Malacostraca	Decapoda	Pilumnidae	Pilumnus hirtellus				10		89											360				25		13					30
	Arthropoda	Malacostraca	Decapoda	Polybiidae	Liocarcinus marmoreus																														47
	Arthropoda	Malacostraca	Decapoda	Polybiidae	Liocarcinus navigator																		46
	Arthropoda	Malacostraca	Decapoda	Polybiidae	Necora puber																													41
	Arthropoda	Malacostraca	Decapoda	Porcellanidae	Pisidia longicornis																												50	63	60
	Arthropoda	Malacostraca	Decapoda	Porcellanidae	Porcellana platycheles																																			10
	Arthropoda	Malacostraca	Decapoda	Processidae	Processa edulis														20
	Arthropoda	Malacostraca	Decapoda	Thoridae	Eualus cranchii				153																58								81	251	65
	Arthropoda	Malacostraca	Mysida	Mysidae	Neomysis integer	1233	30				95	544										27
	Arthropoda	Ostracoda	Podocopida	Cyprididae	Cypridopsis vidua															33
	Arthropoda	Thecostraca	Balanomorpha	Balanidae	Amphibalanus eburneus*									13
	Arthropoda	Thecostraca	Balanomorpha	Balanidae	Amphibalanus improvisus*	244	606	581	246	382	145	3563	2986	2439	32	249	169	107	120	119	3370	1686	758	42	74	49	124	54	146	34	49	136	29	363
	Arthropoda	Thecostraca	Balanomorpha	Balanidae	Balanus trigonus*	281	611	102	33	114	40	83		169	114	338	33	162		204	499	864	135	117	379	78	340	83	118		560	155	82	246	1531
	Arthropoda	Thecostraca	Balanomorpha	Chthamalidae	Chthamalus montagui	2860	6781	5772	12	10		324	572	231	2822	1963	1537			12	1427	706	219	2778	3404	4097	14	17	20	5977	3875	4627	7571	4229	9775				1435	1167	6105
	Arthropoda	Thecostraca	Balanomorpha	Elminiidae	Austrominius modestus*	2096	3957	2319	3639	4046	2216	4593	8067	5007	1133	2013	2911	2317	2252	1200	3915	4245	1570	927	588	471	1268	938	1357	137	120	92	146	584	458			133
	Arthropoda	Thecostraca	Verrucomorpha	Verrucidae	Verruca stroemia	386	1848	783	75	62	13			19	429	924	670	138	28	30	236	45		475	579	435	142	41	121	270	78	144	158	568	749	36	414	80	55	41	526
	Arthropoda	Thecostraca		Sacculinidae	Sacculina carcini	449	1211	463	243	420	99	661	1393	1043	3104	747	511	128	247	285	923	729	214	333	303	34	38	32		135	34	324		230
	Bryozoa	Gymnolaemata	Cheilostomatida	Candidae	Tricellaria inopinata*																										13
	Bryozoa	Gymnolaemata	Cheilostomatida	Electridae	Electra pilosa	78	43	17	78	194	124					15	44	683	530	494	9			10	19	28	481	585	579	33	11	33					294	100	90	35	32
	Bryozoa	Gymnolaemata	Cheilostomatida	Membraniporidae	Membranipora membranacea	18	105		32	102	72					53	167	308	103					9		36	237	100	118					26					30
	Chordata	Ascidiacea	Phlebobranchia	Ascidiidae	Ascidiella scabra																				9
	Chordata	Teleostei	Acanthuriformes	Chaetodontidae	Heniochus acuminatus																									40
	Chordata	Teleostei	Blenniiformes	Blenniidae	Lipophrys pholis																														1307
	Chordata	Teleostei	Callionymiformes	Callionymidae	Callionymus lyra																											32
	Chordata	Teleostei	Eupercaria incertae sedis	Labridae	Ctenolabrus rupestris																																				752
	Chordata	Teleostei	Gadiformes	Gadidae	Raniceps raninus																											9
	Chordata	Teleostei	Gadiformes	Gadidae	Trisopterus luscus				29																		1177
	Chordata	Teleostei	Gobiiformes	Gobiidae	Aphia minuta							59											133																22		12
	Chordata	Teleostei	Gobiiformes	Gobiidae	Crystallogobius linearis														81
	Chordata	Teleostei	Gobiiformes	Gobiidae	Gobius niger							47
	Chordata	Teleostei	Gobiiformes	Gobiidae	Pomatoschistus flavescens																	273
	Chordata	Teleostei	Gobiiformes	Gobiidae	Pomatoschistus microps							24	310								127	55
	Chordata	Teleostei	Gobiiformes	Gobiidae	Pomatoschistus pictus																												22
	Chordata	Teleostei	Scombriformes	Scombridae	Scomber scombrus													17
	Cnidaria	Hydrozoa	Anthoathecata	Bougainvilliidae	Bougainvillia muscus														15							38
	Cnidaria	Hydrozoa	Anthoathecata	Corynidae	Stauridiosarsia gemmifera												10
	Cnidaria	Hydrozoa	Anthoathecata	Hydractiniidae	Hydractinia echinata																											36
	Cnidaria	Hydrozoa	Anthoathecata	Pandeidae	Amphinema dinema																																100	528	188
	Cnidaria	Hydrozoa	Anthoathecata	Rathkeidae	Lizzia blondina																28						36			9		14								14
	Cnidaria	Hydrozoa	Leptothecata	Aglaopheniidae	Aglaophenia pluma																															248
	Cnidaria	Hydrozoa	Leptothecata	Campanulariidae	Campanularia hincksii																																27
	Cnidaria	Hydrozoa	Leptothecata	Campanulariidae	Clytia gracilis																															190	59	149
	Cnidaria	Hydrozoa	Leptothecata	Campanulariidae	Clytia hemisphaerica			16										15			21						166	31	97	16		11				188	77	393	49		20
	Cnidaria	Hydrozoa	Leptothecata	Campanulariidae	Clytia paulensis																															70	42	79
	Cnidaria	Hydrozoa	Leptothecata	Campanulariidae	Obelia dichotoma	195	343	478	40	37	17	87	71	226	125	452	127	56	26	118	91	1003	417	25	51	121	2289	199	686	399	167	666				1392	1272	1296	118	54	9
	Cnidaria	Hydrozoa	Leptothecata	Campanulariidae	Obelia geniculata	205	232	371				23			662	200	197				16	9	10	988	829	1424	80	27	45	12		20	208	223	90	239	74	181
	Cnidaria	Hydrozoa	Leptothecata	Plumulariidae	Plumularia setacea																																375
	Echinodermata	Echinoidea	Camarodonta	Parechinidae	Paracentrotus lividus			9
	Echinodermata	Echinoidea	Camarodonta	Parechinidae	Psammechinus miliaris					17								238								20	20	22		10
	Echinodermata	Echinoidea	Spatangoida	Loveniidae	Echinocardium cordatum																																		12	23
	Echinodermata	Ophiuroidea	Amphilepidida	Amphiuridae	Acrocnida brachiata																									21
	Echinodermata	Ophiuroidea	Amphilepidida	Amphiuridae	Amphiura filiformis	9		76	15		205	18	77	24				27	109	18	200	198	42	82			1323	233	438	108		116	812	12	50	72			116	29	46
	Echinodermata	Ophiuroidea	Amphilepidida	Ophiotrichidae	Ophiothrix fragilis																				17	84						14	1011	65	49
	Echinodermata	Ophiuroidea	Ophiacanthida	Ophiotomidae	Ophiocomina nigra	12				12	9				39												24	11	32				11	15		51	57
	Hemichordata	Enteropneusta	[unassigned] Enteropneusta	Ptychoderidae	Balanoglossus clavigerus																											11
	Mollusca	Bivalvia	Adapedonta	Hiatellidae	Hiatella arctica	1092	1353	504	9	105		32	197	35	189	618	1133		66			51	14	704	694	565				100	85	103	307	616	797					101	204
	Mollusca	Bivalvia	Mytilida	Mytilidae	Musculus costulatus																												23
	Mollusca	Bivalvia	Mytilida	Mytilidae	Mytilus edulis							11	23	20							30	59	18							12	23	22								23	13
	Mollusca	Bivalvia	Ostreida	Ostreidae	Ostrea angasi									12								11								23	29	44								89	64
	Mollusca	Bivalvia	Ostreida	Pinnidae	Atrina fragilis																				17
	Mollusca	Bivalvia	Venerida	Mactridae	Spisula subtruncata		14																									10
	Mollusca	Bivalvia	Venerida	Veneridae	Ruditapes philippinarum*										28
	Mollusca	Gastropoda	[unassigned] Caenogastropoda	Cerithiidae	Bittium reticulatum	608	252	181							77	99	240				41			200	90	190				65	10		29	304	140					74
	Mollusca	Gastropoda	[unassigned] Caenogastropoda	Cerithiopsidae	Cerithiopsis petanii																										53										678
	Mollusca	Gastropoda	Cephalaspidea	Haminoeidae	Haminoea orbignyana			22
	Mollusca	Gastropoda	Cephalaspidea	Haminoeidae	Haminoea orteai		66	44	94							15				52						123	25		62					23
	Mollusca	Gastropoda	Littorinimorpha	Caecidae	Caecum trachea											46
	Mollusca	Gastropoda	Littorinimorpha	Calyptraeidae	Crepidula fornicata*																									16		11
	Mollusca	Gastropoda	Littorinimorpha	Hydrobiidae	Peringia ulvae	172	357	287	218	166	48	1941	2968	3132	65	56	37	392	123	130	686	1232	797	21	48	47	104	37	219	2922	1839	4118		36	34	12	134	21	82	44
	Mollusca	Gastropoda	Littorinimorpha	Littorinidae	Littorina littorea																																	40
	Mollusca	Gastropoda	Littorinimorpha	Rissoidae	Alvania beanii																													18
	Mollusca	Gastropoda	Littorinimorpha	Rissoidae	Onoba semicostata																											18								56
	Mollusca	Gastropoda	Littorinimorpha	Triviidae	Trivia monacha																												15
	Mollusca	Gastropoda	Neogastropoda	Nassariidae	Tritia incrassata		87									55					17					323						16	65	16	39				30		13
	Mollusca	Gastropoda	Neogastropoda	Nassariidae	Tritia nitida																		14	24											13				43
	Mollusca	Gastropoda	Neogastropoda	Nassariidae	Tritia reticulata																	17	10							71	63	61			11				21	20	61
	Mollusca	Gastropoda	Nudibranchia	Aeolidiidae	Aeolidia filomenae					11																									13
	Mollusca	Gastropoda	Nudibranchia	Aeolidiidae	Aeolidiella sanguinea																																			53
	Mollusca	Gastropoda	Nudibranchia	Aeolidiidae	Spurilla neapolitana				307	142	107							432		80	19					25	229	44	251				110				217				231
	Mollusca	Gastropoda	Nudibranchia	Calmidae	Calma gobioophaga																		23
	Mollusca	Gastropoda	Nudibranchia	Dotidae	Doto coronata		21		117	197	29					47		135	54	62				23	21		99	37		23		22	74					190
	Mollusca	Gastropoda	Nudibranchia	Dotidae	Doto koenneckeri							10		18	11						110	28								25	33	110								39
	Mollusca	Gastropoda	Nudibranchia	Dotidae	Doto millbayana	11	15	74	21	17	9		39	15			52	52	39			68	70			15	58	28	16	112	66	380	59	43					45	23	15
	Mollusca	Gastropoda	Nudibranchia	Dotidae	Doto pinnatifida	36		55																								81		238
	Mollusca	Gastropoda	Nudibranchia	Embletoniidae	Embletonia pulchra		130										11
	Mollusca	Gastropoda	Nudibranchia	Eubranchidae	Amphorina linensis												81
	Mollusca	Gastropoda	Nudibranchia	Eubranchidae	Capellinia doriae					11																	31						19				210
	Mollusca	Gastropoda	Nudibranchia	Eubranchidae	Eubranchus exiguus																				23									45
	Mollusca	Gastropoda	Nudibranchia	Facelinidae	Facelina annulicornis											107	15								13	26
	Mollusca	Gastropoda	Nudibranchia	Facelinidae	Facelina bostoniensis																														365
	Mollusca	Gastropoda	Nudibranchia	Facelinidae	Favorinus branchialis			28				34				42	57				38	132	18	28	56	55		9	84	107	64	88			14						89
	Mollusca	Gastropoda	Nudibranchia	Flabellinidae	Edmundsella pedata	56																79			67	32					21		57			53			356
	Mollusca	Gastropoda	Nudibranchia	Goniodorididae	Goniodoris castanea		110									22	114							92									163	97
	Mollusca	Gastropoda	Nudibranchia	Goniodorididae	Goniodoris nodosa																									16
	Mollusca	Gastropoda	Nudibranchia	Hancockiidae	Hancockia uncinata	10																			52								25	40						133
	Mollusca	Gastropoda	Nudibranchia	Polyceridae	Limacia clavigera	151		103		20							93							15	148								136	83
	Mollusca	Gastropoda	Nudibranchia	Polyceridae	Polycera quadrilineata					57						58	252							138		138		29												102
	Mollusca	Gastropoda	Nudibranchia	Tergipedidae	Tergipes tergipes					51				15	58	18	14			10									16				10	47	9	58	181
	Mollusca	Gastropoda	Nudibranchia	Trinchesiidae	Catriona aurantia					16										200								293			11							821
	Mollusca	Gastropoda	Nudibranchia	Trinchesiidae	Rubramoena amoena																					18	11									101
	Mollusca	Gastropoda	Nudibranchia	Trinchesiidae	Trinchesia caerulea							38
	Mollusca	Gastropoda	Nudibranchia	Trinchesiidae	Trinchesia cuanensis				39	10									13															22			130	23
	Mollusca	Gastropoda	Nudibranchia	Trinchesiidae	Trinchesia foliata	74	183		106	808	155					82	110		404	104				35		48	93	80		78	26	88	114	20	21	821	480	1357		165
	Mollusca	Gastropoda	Siphonariida	Siphonariidae	Siphonaria pectinata			135																											60
	Mollusca	Gastropoda	Trochida	Phasianellidae	Tricolia pullus			19	138	1128	15			62		58			271		85	203	113			81	383	103	51	419	71	311			55	144			150	40	1575
	Mollusca	Gastropoda	Trochida	Trochidae	Phorcus lineatus																49											11								66
	Mollusca	Gastropoda	Trochida	Trochidae	Steromphala pennanti				17			10						74			44	29	10							123	16	16							142	58	193
	Mollusca	Gastropoda	Trochida	Trochidae	Steromphala umbilicalis							84		32								144	38							99	55	354							234	199	785
	Mollusca	Gastropoda		Hedylopsidae	Hedylopsis spiculifera																													19
	Mollusca	Gastropoda		Limapontiidae	Limapontia capitata	1196	3503	1160						217	637	472	935						106		184	83				89	58	273	654	888	111
	Mollusca	Gastropoda		Limapontiidae	Limapontia depressa	654	561	893	4664	7256	1389	2864	4462	2209	168	174	349	6690	3767	1834	2749	945	70				1889	464	1036
	Mollusca	Gastropoda		Limapontiidae	Placida dendritica					12
	Mollusca	Gastropoda		Parhedylidae	Microhedyle glandulifera	99	200	140								109	256							59	120	11								267	96
	Mollusca	Gastropoda		Patellidae	Patella pellucida				50										97	93							1333	518	200								138	577
	Mollusca	Gastropoda		Patellidae	Patella ulyssiponensis				468	480								1036				540									22	9				26					898
	Mollusca	Gastropoda		Patellidae	Patella vulgata				14									32	16	113							28	11	20							137
	Mollusca	Gastropoda		Plakobranchidae	Elysia viridis	169	522	332							108	59	254							71	36	170		11					20	88
	Mollusca	Polyplacophora	Chitonida	Acanthochitonidae	Acanthochitona crinita																				15	25							338	80
	Nemertea	Hoplonemertea	Monostilifera	Emplectonematidae	Emplectonema gracile																													108					71
	Nemertea	Hoplonemertea	Monostilifera	Oerstediidae	Oerstedia dorsalis																												103
	Porifera	Demospongiae	Suberitida	Halichondriidae	Hymeniacidon perlevis																					9
18S	Annelida	Polychaeta	Amphinomida	Euphrosinidae	Euphrosine foliosa														60
	Annelida	Polychaeta	Eunicida	Lumbrineridae	Ninoe nigripes							13		20							17											10
	Annelida	Polychaeta	Eunicida	Lumbrineridae	Scoletoma zonata							130	113	107							73	108	57
	Annelida	Polychaeta	Phyllodocida	Chrysopetalidae	Bhawania cryptocephala	80										13	70																					224
	Annelida	Polychaeta	Phyllodocida	Nephtyidae	Nephtys incisa											23	24								15	24								132
	Annelida	Polychaeta	Phyllodocida	Nereididae	Platynereis dumerilii																										10	14			10
	Annelida	Polychaeta	Phyllodocida	Phyllodocidae	Eteone longa									13
	Annelida	Polychaeta	Phyllodocida	Phyllodocidae	Eumida arctica	64									23		9
	Annelida	Polychaeta	Phyllodocida	Phyllodocidae	Eumida sanguinea		20																		27
	Annelida	Polychaeta	Phyllodocida	Polynoidae	Gastrolepidia clavigera																															47
	Annelida	Polychaeta	Phyllodocida	Polynoidae	Harmothoe imbricata										17	22	172																	147
	Annelida	Polychaeta	Phyllodocida	Polynoidae	Harmothoe impar	157	100			9						40								15		103								9	46
	Annelida	Polychaeta	Phyllodocida	Polynoidae	Lepidonotus sublevis	10																										10
	Annelida	Polychaeta	Phyllodocida	Sigalionidae	Pholoe baltica	32	24	9						18			13				12									27				12
	Annelida	Polychaeta	Phyllodocida	Sigalionidae	Pisione remota	104	99	53							123	66	376							125	70	184								276	32
	Annelida	Polychaeta	Phyllodocida	Sigalionidae	Sigalion spinosus									34
	Annelida	Polychaeta	Spionida	Poecilochaetidae	Poecilochaetus serpens																												573
	Annelida	Polychaeta	Spionida	Spionidae	Aurospio foodbancsia															37
	Annelida	Polychaeta	Spionida	Spionidae	Malacoceros fuliginosus															10																247	50	18
	Annelida	Polychaeta	Terebellida	Pectinariidae	Lagis koreni													45				13	15				10	69
	Annelida	Polychaeta	Terebellida	Terebellidae	Nicolea uspiana							80	22	59				39	76		105	64	88							306	44	151							12	9	56
	Annelida	Polychaeta		Arenicolidae	Abarenicola pacifica																															73		48
	Annelida	Polychaeta		Capitellidae	Capitella teleta	872	961	406	74	20	67	82			2558	316	86	20	27	263	260	60		764	915	1415	216	240	217					195	58			357
	Annelida	Polychaeta		Magelonidae	Magelona mirabilis																21
	Annelida	Polychaeta		Protodrilidae	Lindrilus rubropharyngeus										11
	Annelida	Polychaeta		Sabellariidae	Gunnarea gaimardi				27						17												13		16
	Annelida		Sipuncula	Phascolosomatidae	Phascolosoma (Phascolosoma) granulatum											21																		181	64
	Arthropoda	Arachnida	Trombidiformes	Halacaridae	Halacaroides antoniazziae			190
	Arthropoda	Branchiopoda	Ctenopoda	Sididae	Penilia avirostris														13	23							13	20	36								143
	Arthropoda	Copepoda	Calanoida	Aetideidae	Gaetanus minutus													22
	Arthropoda	Copepoda	Calanoida	Calanidae	Calanoides carinatus						81	482	288	209		29					129	45		27														347
	Arthropoda	Copepoda	Calanoida	Calanidae	Calanus finmarchicus																						19		15
	Arthropoda	Copepoda	Calanoida	Calanidae	Calanus glacialis			322	351	380	633	473	674	37			99	1646	4709	1063	474	933	200	1088	635		3664	1508	1360	216				54				756
	Arthropoda	Copepoda	Calanoida	Candaciidae	Candacia bipinnata								21				100										122
	Arthropoda	Copepoda	Calanoida	Centropagidae	Centropages typicus			121	470	419	637	416	815	231	241	68	25	635	2162	816	228	164	75		15	9	2888	2214	1799	29			24			447	1619	1143
	Arthropoda	Copepoda	Calanoida	Centropagidae	Isias clavipes										53																	13
	Arthropoda	Copepoda	Calanoida	Metridinidae	Metridia gerlachei													28									194	186	219					216	562
	Arthropoda	Copepoda	Calanoida	Metridinidae	Pleuromamma borealis												18			23
	Arthropoda	Copepoda	Calanoida	Pontellidae	Anomalocera patersonii					13
	Arthropoda	Copepoda	Calanoida	Pseudodiaptomidae	Pseudodiaptomus marinus*			61				14		16	10												12									105
	Arthropoda	Copepoda	Calanoida	Subeucalanidae	Subeucalanus subtenuis																						122							107
	Arthropoda	Copepoda	Calanoida	Temoridae	Temora discaudata				25	16	29									19							275	56
	Arthropoda	Copepoda	Calanoida	Temoridae	Temora longicornis	2660	2955	3338	2446	2073	3517	949	531	1382	3568	668	1251	430	2100	1040	211	351	440	3127	2953	6650	3023	2665	1296	281	314	360	6022	899	7603	86	177	134		182	10
	Arthropoda	Copepoda	Cyclopoida	Lichomolgidae	Astericola clausii								12
	Arthropoda	Copepoda	Cyclopoida	Oithonidae	Oithona davisae	49		195															14	41
	Arthropoda	Copepoda	Harpacticoida	Ameiridae	Ameira scotti																					21
	Arthropoda	Copepoda	Harpacticoida	Harpacticidae	Zaus caeruleus			18																				25	32	557		669			307	395	301	58
	Arthropoda	Copepoda	Monstrilloida	Monstrillidae	Caromiobenella helgolandica						19								81																	377
	Arthropoda	Copepoda	Polyarthra	Canuellidae	Canuella perplexa																											54
	Arthropoda	Copepoda	Siphonostomatoida	Caligidae	Caligus brevipedis										30				78				32						66					135	36			10
	Arthropoda	Copepoda	Siphonostomatoida	Caligidae	Caligus uniartus																						11									80
	Arthropoda	Copepoda	Siphonostomatoida	Caligidae	Lepeophtheirus hospitalis																34		37
	Arthropoda	Malacostraca	Decapoda	Carcinidae	Carcinus maenas										53						28	82	53
	Arthropoda	Malacostraca	Decapoda	Diogenidae	Clibanarius antillensis										67		29						21	9										36
	Arthropoda	Malacostraca	Decapoda	Varunidae	Eriocheir sinensis*								75									11												37
	Arthropoda	Malacostraca	Mysida	Mysidae	Leptomysis mediterranea																				27
	Arthropoda	Malacostraca	Mysida	Mysidae	Neomysis integer	5636	221				196	1919		20								166
	Arthropoda	Malacostraca	Mysida	Mysidae	Siriella armata																																	1040
	Arthropoda	Ostracoda	Podocopida	Cyprididae	Cypridopsis japonica															12				51
	Arthropoda	Ostracoda	Podocopida	Cytheruridae	Hemicytherura kajiyamai										29					17											18		37		104		38
	Arthropoda	Ostracoda	Podocopida	Cytheruridae	Semicytherura striata										44								10		22
	Arthropoda	Ostracoda	Podocopida	Leptocytheridae	Leptocythere lacertosa	149	118	147	9	13	20			27	52	14	22			24				28	20	149						12
	Arthropoda	Pycnogonida	Pantopoda	Ammotheidae	Achelia echinata																															10	41	26
	Arthropoda	Pycnogonida	Pantopoda	Ammotheidae	Ammothella tuberculata																															19	25
	Arthropoda	Pycnogonida	Pantopoda	Phoxichilidiidae	Anoplodactylus erectus																															51
	Arthropoda	Thecostraca	Balanomorpha	Austrobalanidae	Austrobalanus imperator	219	171	375	130	134	115	94	86	174	93	30	58	66	208	59	41	51	53	76	63	57	36	72	36	46	143	57	139	41	214	21			53	87	74
	Arthropoda	Thecostraca	Balanomorpha	Chthamalidae	Chthamalus stellatus	138	77	191							128		39						9	121	42	101					20	12	114	95	197				17		16
	Arthropoda	Thecostraca	Lithoglyptida	Lithoglyptidae	Auritoglyptes bicornis	19		11	35	41	44	15			25		12	24	96	14	30	20	20	9			158	71	117				20	13				64
	Arthropoda	Thecostraca	Pollicipedomorpha	Pollicipedidae	Pollicipes pollicipes			19
	Arthropoda	Thecostraca	Verrucomorpha	Verrucidae	Verruca spengleri	15		23							19		25		12					16			14
	Arthropoda	Thecostraca		Sacculinidae	Sacculina carcini			21					15	21	46				16
	Bryozoa	Gymnolaemata	Cheilostomatida	Scrupariidae	Scruparia chelata	16	30	60			52				16	13			229					55	43	53	29	15							30
	Bryozoa	Gymnolaemata	Ctenostomatida	Alcyonidiidae	Alcyonidium gelatinosum							9
	Chaetognatha	Sagittoidea	Aphragmophora	Sagittidae	Parasagitta friderici				25									71	43								12	80	79							11	1338	498
	Chordata	Ascidiacea	Aplousobranchia	Holozoidae	Distaplia dubia																											12
	Chordata	Ascidiacea	Phlebobranchia	Cionidae	Ciona intestinalis*																											17
	Chordata	Ascidiacea	Stolidobranchia	Pyuridae	Microcosmus squamiger*			20																		45				24		74	84								16
	Chordata	Ascidiacea	Stolidobranchia	Styelidae	Styela plicata*																									20
	Chordata	Teleostei	Blenniiformes	Tripterygiidae	Tripterygion delaisi																														1060
	Chordata	Teleostei	Clupeiformes	Clupeidae	Alosa alosa					192	50								14						62			23
	Chordata	Teleostei	Cyprinodontiformes	Cyprinodontidae	Cyprinodon variegatus		15								13				74									19
	Chordata	Teleostei	Eupercaria incertae sedis	Moronidae	Dicentrarchus labrax																																				792
	Chordata	Teleostei	Gadiformes	Gadidae	Gadus morhua																						102
	Chordata	Teleostei	Gobiiformes	Eleotridae	Mogurnda adspersa			41	237			769	2018								2971	80									16				21
	Chordata	Teleostei	Pleuronectiformes	Pleuronectidae	Pleuronichthys cornutus									13
	Cnidaria	Hydrozoa	Anthoathecata	Cordylophoridae	Cordylophora caspia*			11
	Cnidaria	Hydrozoa	Anthoathecata	Corynidae	Stauridiosarsia gemmifera												20			92														12
	Cnidaria	Hydrozoa	Anthoathecata	Eudendriidae	Eudendrium racemosum																											11				21
	Cnidaria	Hydrozoa	Anthoathecata	Hydractiniidae	Podocoryna exigua	23																					23					16
	Cnidaria	Hydrozoa	Anthoathecata	Oceaniidae	Turritopsis nutricula																																130	145
	Cnidaria	Hydrozoa	Anthoathecata	Rathkeidae	Lizzia blondina																17						111	19	9	30				9
	Cnidaria	Hydrozoa	Anthoathecata	Tubulariidae	Ectopleura marina																							32										435
	Cnidaria	Hydrozoa	Leptothecata	Aglaopheniidae	Aglaophenia tubiformis																															58
	Cnidaria	Hydrozoa	Leptothecata	Campanulariidae	Clytia hemisphaerica																															47	16	11
	Cnidaria	Hydrozoa	Leptothecata	Campanulariidae	Obelia dichotoma																															31	29	20
	Cnidaria	Hydrozoa	Leptothecata	Campanulariidae	Obelia geniculata										10										41					23				31		28	11	19
	Cnidaria	Hydrozoa	Leptothecata	Campanulariidae	Obelia longissima																															159	147	111
	Cnidaria	Hydrozoa	Leptothecata	Campanulariidae	Orthopyxis everta																																	10
	Cnidaria	Hydrozoa	Leptothecata	Campanulariidae	Orthopyxis integra																															62	17	9
	Cnidaria	Hydrozoa	Leptothecata	Haleciidae	Halecium halecinum																															21		16
	Cnidaria	Hydrozoa	Leptothecata	Plumulariidae	Plumularia strictocarpa																																201
	Cnidaria	Hydrozoa	Leptothecata	Sertulariidae	Abietinaria filicula																																	9
	Cnidaria	Hydrozoa	Leptothecata	Sertulariidae	Salacia desmoides																									20		82
	Echinodermata	Echinoidea	Camarodonta	Strongylocentrotidae	Strongylocentrotus purpuratus													43									42	12
	Echinodermata	Ophiuroidea	Amphilepidida	Ophiotrichidae	Ophiothrix (Ophiothrix) oerstedii	10									11	9									13									20
	Echinodermata	Ophiuroidea	Ophiacanthida	Ophiodermatidae	Ophioderma cinereum																															17	15
	Entoprocta			Loxosomatidae	Loxosomella stomatophora														15								10	11								136	188
	Mollusca	Bivalvia	Adapedonta	Hiatellidae	Hiatella arctica	12309	6386	15855	239	317	310	292	347	2041	7539	140	6259	876	1988	289	437	655	917	9814	6478	10691	280	399	216	35	1357	224	5919	5450	5964		648	342	13	202	24
	Mollusca	Bivalvia	Arcida	Arcidae	Anadara broughtonii																														22
	Mollusca	Bivalvia	Cardiida	Cardiidae	Cerastoderma edule				10			10	18	19		16			40		35	38	28		82	27	17					14		11
	Mollusca	Bivalvia	Cardiida	Cardiidae	Dallocardia muricata																													26
	Mollusca	Bivalvia	Cardiida	Cardiidae	Parvicardium exiguum																									13
	Mollusca	Bivalvia	Cardiida	Donacidae	Donax trunculus				135	139	102							171	812	162							1035	794	421								70
	Mollusca	Bivalvia	Cardiida	Psammobiidae	Asaphis deflorata	11									22	13								26	91
	Mollusca	Bivalvia	Cardiida	Solecurtidae	Tagelus californianus	9															350					24	16	11					23	121		11		246
	Mollusca	Bivalvia	Galeommatida	Galeommatidae	Galeomma turtoni														77								13
	Mollusca	Bivalvia	Galeommatida	Lasaeidae	Brachiomya stigmatica					15								27	10							12	34	23										59
	Mollusca	Bivalvia	Galeommatida	Lasaeidae	Koreamya arcuata	24										17									52			13						88
	Mollusca	Bivalvia	Galeommatida	Lasaeidae	Paraborniola matsumotoi	24				31	19				13	12		48	20	67				18	41		17	65					35	11	31	68	9	73
	Mollusca	Bivalvia	Limida	Limidae	Limaria hians	34	18	9								22		12						37				18						40	17
	Mollusca	Bivalvia	Myida	Pholadidae	Barnea candida																								12
	Mollusca	Bivalvia	Myida	Pholadidae	Pholas dactylus													10	13
	Mollusca	Bivalvia	Myida	Teredinidae	Nototeredo norvagica				12					27	22					25															13	192	134	262
	Mollusca	Bivalvia	Mytilida	Mytilidae	Musculus lateralis	225	188	392			16				54	77	103		26					543	294	225		13					265	190	161		14
	Mollusca	Bivalvia	Mytilida	Mytilidae	Mytilus edulis	264	160	324	99	36	123	229	402	446	241	120	140	123	277	134	428	369	407	320	246	137	79	122	124	12	232	22	16		34		45	20
	Mollusca	Bivalvia	Ostreida	Ostreidae	Saccostrea glomerata																												13
	Mollusca	Bivalvia	Venerida	Mactridae	Spisula solidissima		14								42									22	11			10
	Mollusca	Bivalvia	Venerida	Veneridae	Callista chione																				16
	Mollusca	Bivalvia	Venerida	Veneridae	Mercenaria mercenaria*																				32	34								9
	Mollusca	Bivalvia	Venerida	Veneridae	Petricola lapicida																				14
	Mollusca	Bivalvia	Venerida	Veneridae	Venerupis aspera			14	30	15	20				18	10	9	25	51					33	75		31	64	33					35	16
	Mollusca	Gastropoda	[unassigned] Caenogastropoda	Planaxidae	Planaxis sulcatus			10																										11
	Mollusca	Gastropoda	Cephalaspidea	Cylichnidae	Cylichna cylindracea			107																						100
	Mollusca	Gastropoda	Cephalaspidea	Haminoeidae	Lamprohaminoea cymbalum			14												23						10	47		38
	Mollusca	Gastropoda	Littorinimorpha	Hydrobiidae	Peringia ulvae	12						41	32	69				12	12	13	11		28				14		21
	Mollusca	Gastropoda	Littorinimorpha	Lironobidae	Merelina tokunagai	101																												9
	Mollusca	Gastropoda	Neogastropoda	Nassariidae	Ilyanassa obsoleta		16									9										59
	Mollusca	Gastropoda	Nudibranchia	Cuthonidae	Cuthona nana															24								31										101
	Mollusca	Gastropoda	Nudibranchia	Discodorididae	Geitodoris heathi			18			12
	Mollusca	Gastropoda	Nudibranchia	Discodorididae	Jorunna tomentosa		112	31								18	55							214	45	93								28
	Mollusca	Gastropoda	Nudibranchia	Goniodorididae	Ancula gibbosa	49			34	28	26				23			43	98	33				12			23	23						27			173	29
	Mollusca	Gastropoda	Nudibranchia	Goniodorididae	Goniodoris nodosa		18																	12
	Mollusca	Gastropoda	Nudibranchia	Onchidorididae	Atalodoris depressa		61			56						18	33			35				57
	Mollusca	Gastropoda	Nudibranchia	Onchidorididae	Atalodoris jannae		21																												16
	Mollusca	Gastropoda	Nudibranchia	Polyceridae	Polycera quadrilineata	19						28				23	42							26	44	9		18						15
	Mollusca	Gastropoda	Nudibranchia	Tergipedidae	Tergipes tergipes	12																														33	54
	Mollusca	Gastropoda	Nudibranchia	Trinchesiidae	Trinchesia caerulea	74			35	34	17								11	9							9	13								118	156	211
	Mollusca	Gastropoda		Hermaeidae	Aplysiopsis minor		10																											13
	Mollusca	Gastropoda		Limapontiidae	Calliopaea bellula	25	89	25							15		36								15					10				51
	Mollusca	Gastropoda		Limapontiidae	Ercolania felina	576	1144	431	319	435	146	242	116	171	230	19	99	26	179	210	62	15			29		143	38	38				52	219	15
	Mollusca	Gastropoda		Limapontiidae	Placida cremoniana													10
	Mollusca	Gastropoda		Parhedylidae	Microhedyle glandulifera	29		29							16	9	21							40	22									19	17
	Mollusca	Gastropoda		Plakobranchidae	Bosellia mimetica	58	101	18							77		21							13	148	29		109						44
	Mollusca	Gastropoda		Planorbidae	Biomphalaria glabrata										9
	Mollusca	Gastropoda		Pyramidellidae	Eulimella ventricosa												18
	Mollusca	Gastropoda		Pyramidellidae	Turbonilla lactea	11	14									11	74									91								116
	Nematoda	Chromadorea	Chromadorida	Cyatholaimidae	Paracyatholaimus intermedius																																			20
	Nematoda	Chromadorea	Desmodorida	Desmodoridae	Spirinia parasitifera																										60	11
	Nematoda	Chromadorea	Rhabditida	Cucullanidae	Cucullanus heterodonti	16
	Nematoda	Chromadorea	Rhabditida	Rhabditidae	Litoditis marina		50	114				126
	Nemertea	Palaeonemertea	Archinemertea	Cephalotrichidae	Cephalothrix hongkongiensis																												17
	Nemertea	Palaeonemertea	Archinemertea	Cephalotrichidae	Cephalothrix rufifrons																							102					20
	Phoronida			Phoronidae	Phoronis emigi	25	30								27	24								14	56	36							12	29	11			81
	Platyhelminthes		Polycladida	Euryleptidae	Prostheceraeus vittatus										11											9			16									1159
	Platyhelminthes		Polycladida	Notoplanidae	Notoplana australis			13	13	74	36				58		210								621	11	2522	2892	1914				68	41	35
	Platyhelminthes		Polycladida	Planoceridae	Paraplanocera oligoglena		23
	Platyhelminthes		Prolecithophora	Plagiostomidae	Vorticeros auriculatum																															592	705
	Platyhelminthes		Prolecithophora	Protomonotresidae	Protomonotresis centrophora										17
	Platyhelminthes		Rhabdocoela	Placorhynchidae	Placorhynchus dimorphis	40
	Platyhelminthes		Rhabdocoela	Placorhynchidae	Placorhynchus octaculeatus			31
	Platyhelminthes		Rhabdocoela	Provorticidae	Provortex balticus	15										14	12								10									11
	Porifera	Demospongiae	Dictyoceratida	Dysideidae	Lamellodysidea herbacea			14
	Porifera	Demospongiae	Poecilosclerida	Desmoxyidae	Desmoxya pelagiae																						29										100	704
	Porifera	Demospongiae	Poecilosclerida	Mycalidae	Mycale (Carmia) sanguinea																											13	45
	Porifera	Demospongiae	Suberitida	Halichondriidae	Halichondria (Halichondria) bowerbanki																															9

## Sheet: Table S5
Table S5. Significant (p > 0.05) correlated species to both axis in the nMDS (NMDS1 and NMDS2) for the whole zooplankton recovered data.
Species	Pearson correlation
	NMDS1	NMDS2
Acartia clausi	0.0686558	-0.524109
Aglaophenia pluma	-0.404721	-0.0455605
Amphibalanus improvisus	0.16668	0.440496
Austrominius modestus	0.00348693	0.437411
Bittium reticulatum	0.114232	-0.609317
Capellinia doriae	-0.380503	0.00457925
Capitella capitata	0.0394068	-0.420748
Catriona aurantia	-0.404873	-0.0322693
Chthamalus montagui	0.446925	-0.686858
Clytia gracilis	-0.608225	-0.0974893
Clytia hemisphaerica	-0.558802	-0.00677008
Clytia paulensis	-0.629926	-0.0987384
Doto coronata	-0.487408	0.114566
Echinocardium cordatum	0.412173	0.128634
Electra pilosa	-0.456764	0.409722
Elysia viridis	0.0582622	-0.488724
Eubranchus exiguus	0.0441587	-0.39662
Evadne nordmanni	-0.362723	0.205596
Favorinus branchialis	0.438991	0.0342538
Goniodoris castanea	0.0116049	-0.493702
Hancockia uncinata	0.296804	-0.236665
Harmothoe clavigera	0.044986	-0.553748
Hiatella arctica	0.156482	-0.706773
Lanice conchilega	0.226444	0.308862
Limacia clavigera	0.0225972	-0.596279
Limapontia capitata	0.0694877	-0.469237
Limapontia depressa	-0.21558	0.55503
Microhedyle glandulifera	0.0824565	-0.634077
Mytilus edulis	0.45166	0.424853
Nephasoma rimicola	-0.412393	0.0696143
Nephtys hombergii	0.0577391	-0.486008
Obelia dichotoma	-0.474571	0.0777905
Obelia geniculata	-0.0114355	-0.599203
Ophiocomina nigra	-0.589706	-0.134984
Ophiothrix fragilis	0.00510085	-0.393463
Ostrea angasi	0.557939	0.161328
Patella pellucida	-0.394439	0.115171
Patella vulgata	-0.517368	0.177083
Penilia avirostris	-0.434484	0.380617
Peringia ulvae	0.318847	0.436107
Pholoe inornata	0.114579	-0.508835
Pisidia longicornis	0.0944029	-0.55088
Pisione puzae	0.0474274	-0.568055
Podon intermedius	-0.313742	0.363773
Pseudocalanus elongatus	-0.269075	0.300237
Pseudodiaptomus marinus	-0.439306	-0.015361
Rubramoena amoena	-0.405567	-0.0747584
Spurilla neapolitana	-0.303008	0.336617
Steromphala pennanti	0.495793	0.339341
Steromphala umbilicalis	0.519035	0.254179
Temora longicornis	-0.0813621	0.548061
Tergipes tergipes	-0.467075	-0.148424
Tomopteris helgolandica	0.045298	-0.661357
Trinchesia cuanensis	-0.436423	0.0187469
Trinchesia foliata	-0.641706	-0.0531347
Tritia reticulata	0.569131	0.169835
Verruca stroemia	0.117435	-0.620505

## Sheet: Table S6
Table S6. Species list that clustered into 7 groups (G1-7).
Phylum	Class	Order	Family	Species	Cluster
Annelida	Clitellata	Tubificida	Naididae	Paranais litoralis	G6
Annelida	Polychaeta	Amphinomida	Amphinomidae	Pareurythoe borealis	G6
Annelida	Polychaeta	Amphinomida	Euphrosinidae	Euphrosine foliosa	G6
Annelida	Polychaeta	Eunicida	Lumbrineridae	Ninoe nigripes	G5
Annelida	Polychaeta	Eunicida	Lumbrineridae	Scoletoma zonata	G5
Annelida	Polychaeta	Eunicida	Onuphidae	Diopatra micrura	G6
Annelida	Polychaeta	Phyllodocida	Chrysopetalidae	Bhawania cryptocephala	G6
Annelida	Polychaeta	Phyllodocida	Nephtyidae	Aglaophamus agilis	G6
Annelida	Polychaeta	Phyllodocida	Nephtyidae	Nephtys assimilis	G6
Annelida	Polychaeta	Phyllodocida	Nephtyidae	Nephtys hombergii	G4
Annelida	Polychaeta	Phyllodocida	Nephtyidae	Nephtys incisa	G6
Annelida	Polychaeta	Phyllodocida	Nereididae	Platynereis dumerilii	G6
Annelida	Polychaeta	Phyllodocida	Phyllodocidae	Eteone longa	G6
Annelida	Polychaeta	Phyllodocida	Phyllodocidae	Eumida arctica	G6
Annelida	Polychaeta	Phyllodocida	Phyllodocidae	Eumida sanguinea	G6
Annelida	Polychaeta	Phyllodocida	Phyllodocidae	Eumida taygete	G6
Annelida	Polychaeta	Phyllodocida	Phyllodocidae	Phyllodoce mucosa	G6
Annelida	Polychaeta	Phyllodocida	Polynoidae	Gastrolepidia clavigera	G6
Annelida	Polychaeta	Phyllodocida	Polynoidae	Harmothoe clavigera	G4
Annelida	Polychaeta	Phyllodocida	Polynoidae	Harmothoe imbricata	G6
Annelida	Polychaeta	Phyllodocida	Polynoidae	Harmothoe impar	G4
Annelida	Polychaeta	Phyllodocida	Polynoidae	Harmothoe mariannae	G6
Annelida	Polychaeta	Phyllodocida	Polynoidae	Lepidonotus sublevis	G6
Annelida	Polychaeta	Phyllodocida	Polynoidae	Polynoe scolopendrina	G6
Annelida	Polychaeta	Phyllodocida	Sigalionidae	Pholoe baltica	G6
Annelida	Polychaeta	Phyllodocida	Sigalionidae	Pholoe inornata	G3
Annelida	Polychaeta	Phyllodocida	Sigalionidae	Pisione puzae	G4
Annelida	Polychaeta	Phyllodocida	Sigalionidae	Pisione remota	G4
Annelida	Polychaeta	Phyllodocida	Sigalionidae	Sigalion spinosus	G6
Annelida	Polychaeta	Phyllodocida	Sigalionidae	Sthenelais boa	G6
Annelida	Polychaeta	Phyllodocida	Tomopteridae	Tomopteris (Johnstonella) helgolandica	G4
Annelida	Polychaeta	Spionida	Poecilochaetidae	Poecilochaetus serpens	G6
Annelida	Polychaeta	Spionida	Spionidae	Aurospio foodbancsia	G6
Annelida	Polychaeta	Spionida	Spionidae	Malacoceros fuliginosus	G6
Annelida	Polychaeta	Spionida	Spionidae	Pseudopolydora paucibranchiata*	G6
Annelida	Polychaeta	Spionida	Spionidae	Spiophanes bombyx	G6
Annelida	Polychaeta	Terebellida	Pectinariidae	Amphictene auricoma	G6
Annelida	Polychaeta	Terebellida	Pectinariidae	Lagis koreni	G7
Annelida	Polychaeta	Terebellida	Terebellidae	Lanice conchilega	G5
Annelida	Polychaeta	Terebellida	Terebellidae	Nicolea uspiana	G5
Annelida	Polychaeta		Arenicolidae	Abarenicola pacifica	G6
Annelida	Polychaeta		Capitellidae	Capitella capitata	G6
Annelida	Polychaeta		Capitellidae	Capitella teleta	G1
Annelida	Polychaeta		Magelonidae	Magelona johnstoni	G5
Annelida	Polychaeta		Magelonidae	Magelona mirabilis	G6
Annelida	Polychaeta		Orbiniidae	Orbinia latreillii	G6
Annelida	Polychaeta		Oweniidae	Owenia fusiformis	G6
Annelida	Polychaeta		Polygordiidae	Polygordius appendiculatus	G6
Annelida	Polychaeta		Protodrilidae	Lindrilus rubropharyngeus	G6
Annelida	Polychaeta		Sabellariidae	Gunnarea gaimardi	G6
Annelida	Polychaeta		Sabellariidae	Sabellaria spinulosa	G6
Annelida		Sipuncula	Golfingiidae	Nephasoma (Nephasoma) rimicola	G6
Annelida		Sipuncula	Phascolosomatidae	Phascolosoma (Phascolosoma) granulatum	G6
Arthropoda	Arachnida	Trombidiformes	Halacaridae	Halacaroides antoniazziae	G6
Arthropoda	Branchiopoda	Ctenopoda	Holopediidae	Holopedium gibberum	G6
Arthropoda	Branchiopoda	Ctenopoda	Sididae	Penilia avirostris	G7
Arthropoda	Branchiopoda	Onychopoda	Podonidae	Evadne nordmanni	G4
Arthropoda	Branchiopoda	Onychopoda	Podonidae	Pleopis polyphemoides	G6
Arthropoda	Branchiopoda	Onychopoda	Podonidae	Podon intermedius	G7
Arthropoda	Copepoda	Calanoida	Acartiidae	Acartia (Acartiura) clausi	G4
Arthropoda	Copepoda	Calanoida	Aetideidae	Gaetanus minutus	G6
Arthropoda	Copepoda	Calanoida	Calanidae	Calanoides carinatus	G5
Arthropoda	Copepoda	Calanoida	Calanidae	Calanus finmarchicus	G6
Arthropoda	Copepoda	Calanoida	Calanidae	Calanus glacialis	G1
Arthropoda	Copepoda	Calanoida	Candaciidae	Candacia bipinnata	G6
Arthropoda	Copepoda	Calanoida	Centropagidae	Centropages typicus	G1
Arthropoda	Copepoda	Calanoida	Centropagidae	Isias clavipes	G6
Arthropoda	Copepoda	Calanoida	Clausocalanidae	Pseudocalanus elongatus	G2
Arthropoda	Copepoda	Calanoida	Metridinidae	Metridia gerlachei	G7
Arthropoda	Copepoda	Calanoida	Metridinidae	Pleuromamma borealis	G6
Arthropoda	Copepoda	Calanoida	Paracalanidae	Paracalanus parvus	G6
Arthropoda	Copepoda	Calanoida	Pontellidae	Anomalocera patersonii	G6
Arthropoda	Copepoda	Calanoida	Pseudodiaptomidae	Pseudodiaptomus marinus*	G7
Arthropoda	Copepoda	Calanoida	Subeucalanidae	Subeucalanus subtenuis	G6
Arthropoda	Copepoda	Calanoida	Temoridae	Temora discaudata	G7
Arthropoda	Copepoda	Calanoida	Temoridae	Temora longicornis	G2
Arthropoda	Copepoda	Calanoida	Temoridae	Temora stylifera	G6
Arthropoda	Copepoda	Cyclopoida	Corycaeidae	Ditrichocorycaeus anglicus	G6
Arthropoda	Copepoda	Cyclopoida	Lichomolgidae	Astericola clausii	G6
Arthropoda	Copepoda	Cyclopoida	Oithonidae	Oithona davisae	G6
Arthropoda	Copepoda	Harpacticoida	Ameiridae	Ameira scotti	G6
Arthropoda	Copepoda	Harpacticoida	Ectinosomatidae	Pseudobradya minor	G6
Arthropoda	Copepoda	Harpacticoida	Harpacticidae	Harpacticus flexus	G3
Arthropoda	Copepoda	Harpacticoida	Harpacticidae	Zaus caeruleus	G7
Arthropoda	Copepoda	Harpacticoida	Tachidiidae	Euterpina acutifrons	G6
Arthropoda	Copepoda	Monstrilloida	Monstrillidae	Caromiobenella helgolandica	G6
Arthropoda	Copepoda	Polyarthra	Canuellidae	Canuella perplexa	G6
Arthropoda	Copepoda	Siphonostomatoida	Caligidae	Caligus brevipedis	G6
Arthropoda	Copepoda	Siphonostomatoida	Caligidae	Caligus uniartus	G6
Arthropoda	Copepoda	Siphonostomatoida	Caligidae	Lepeophtheirus hospitalis	G6
Arthropoda	Malacostraca	Amphipoda	Caprellidae	Phtisica marina	G6
Arthropoda	Malacostraca	Decapoda	Alpheidae	Athanas nitescens	G6
Arthropoda	Malacostraca	Decapoda	Carcinidae	Carcinus maenas	G3
Arthropoda	Malacostraca	Decapoda	Crangonidae	Crangon crangon	G6
Arthropoda	Malacostraca	Decapoda	Crangonidae	Philocheras trispinosus	G6
Arthropoda	Malacostraca	Decapoda	Diogenidae	Clibanarius antillensis	G6
Arthropoda	Malacostraca	Decapoda	Grapsidae	Pachygrapsus marmoratus	G6
Arthropoda	Malacostraca	Decapoda	Hippolytidae	Hippolyte prideauxiana	G6
Arthropoda	Malacostraca	Decapoda	Hippolytidae	Hippolyte varians	G6
Arthropoda	Malacostraca	Decapoda	Palaemonidae	Palaemon longirostris	G6
Arthropoda	Malacostraca	Decapoda	Pilumnidae	Pilumnus hirtellus	G6
Arthropoda	Malacostraca	Decapoda	Polybiidae	Liocarcinus marmoreus	G6
Arthropoda	Malacostraca	Decapoda	Polybiidae	Liocarcinus navigator	G6
Arthropoda	Malacostraca	Decapoda	Polybiidae	Necora puber	G6
Arthropoda	Malacostraca	Decapoda	Porcellanidae	Pisidia longicornis	G6
Arthropoda	Malacostraca	Decapoda	Porcellanidae	Porcellana platycheles	G6
Arthropoda	Malacostraca	Decapoda	Processidae	Processa edulis	G6
Arthropoda	Malacostraca	Decapoda	Thoridae	Eualus cranchii	G6
Arthropoda	Malacostraca	Decapoda	Varunidae	Eriocheir sinensis*	G6
Arthropoda	Malacostraca	Mysida	Mysidae	Leptomysis mediterranea	G6
Arthropoda	Malacostraca	Mysida	Mysidae	Neomysis integer	G6
Arthropoda	Malacostraca	Mysida	Mysidae	Siriella armata	G6
Arthropoda	Ostracoda	Podocopida	Cyprididae	Cypridopsis japonica	G6
Arthropoda	Ostracoda	Podocopida	Cyprididae	Cypridopsis vidua	G6
Arthropoda	Ostracoda	Podocopida	Cytheruridae	Hemicytherura kajiyamai	G6
Arthropoda	Ostracoda	Podocopida	Cytheruridae	Semicytherura striata	G6
Arthropoda	Ostracoda	Podocopida	Leptocytheridae	Leptocythere lacertosa	G4
Arthropoda	Pycnogonida	Pantopoda	Ammotheidae	Achelia echinata	G6
Arthropoda	Pycnogonida	Pantopoda	Ammotheidae	Ammothella tuberculata	G6
Arthropoda	Pycnogonida	Pantopoda	Phoxichilidiidae	Anoplodactylus erectus	G6
Arthropoda	Thecostraca	Balanomorpha	Austrobalanidae	Austrobalanus imperator	G2
Arthropoda	Thecostraca	Balanomorpha	Balanidae	Amphibalanus eburneus*	G6
Arthropoda	Thecostraca	Balanomorpha	Balanidae	Amphibalanus improvisus*	G2
Arthropoda	Thecostraca	Balanomorpha	Balanidae	Balanus trigonus*	G2
Arthropoda	Thecostraca	Balanomorpha	Chthamalidae	Chthamalus montagui	G2
Arthropoda	Thecostraca	Balanomorpha	Chthamalidae	Chthamalus stellatus	G3
Arthropoda	Thecostraca	Balanomorpha	Elminiidae	Austrominius modestus*	G2
Arthropoda	Thecostraca	Lithoglyptida	Lithoglyptidae	Auritoglyptes bicornis	G1
Arthropoda	Thecostraca	Pollicipedomorpha	Pollicipedidae	Pollicipes pollicipes	G6
Arthropoda	Thecostraca	Verrucomorpha	Verrucidae	Verruca spengleri	G6
Arthropoda	Thecostraca	Verrucomorpha	Verrucidae	Verruca stroemia	G2
Arthropoda	Thecostraca		Sacculinidae	Sacculina carcini	G2
Bryozoa	Gymnolaemata	Cheilostomatida	Candidae	Tricellaria inopinata*	G6
Bryozoa	Gymnolaemata	Cheilostomatida	Electridae	Electra pilosa	G2
Bryozoa	Gymnolaemata	Cheilostomatida	Membraniporidae	Membranipora membranacea	G4
Bryozoa	Gymnolaemata	Cheilostomatida	Scrupariidae	Scruparia chelata	G4
Bryozoa	Gymnolaemata	Ctenostomatida	Alcyonidiidae	Alcyonidium gelatinosum	G6
Chaetognatha	Sagittoidea	Aphragmophora	Sagittidae	Parasagitta friderici	G7
Chordata	Ascidiacea	Aplousobranchia	Holozoidae	Distaplia dubia	G6
Chordata	Ascidiacea	Phlebobranchia	Ascidiidae	Ascidiella scabra	G6
Chordata	Ascidiacea	Phlebobranchia	Cionidae	Ciona intestinalis*	G6
Chordata	Ascidiacea	Stolidobranchia	Pyuridae	Microcosmus squamiger*	G6
Chordata	Ascidiacea	Stolidobranchia	Styelidae	Styela plicata*	G6
Chordata	Teleostei	Acanthuriformes	Chaetodontidae	Heniochus acuminatus	G6
Chordata	Teleostei	Blenniiformes	Blenniidae	Lipophrys pholis	G6
Chordata	Teleostei	Blenniiformes	Tripterygiidae	Tripterygion delaisi	G6
Chordata	Teleostei	Callionymiformes	Callionymidae	Callionymus lyra	G6
Chordata	Teleostei	Clupeiformes	Clupeidae	Alosa alosa	G6
Chordata	Teleostei	Cyprinodontiformes	Cyprinodontidae	Cyprinodon variegatus	G6
Chordata	Teleostei	Eupercaria incertae sedis	Labridae	Ctenolabrus rupestris	G6
Chordata	Teleostei	Eupercaria incertae sedis	Moronidae	Dicentrarchus labrax	G6
Chordata	Teleostei	Gadiformes	Gadidae	Gadus morhua	G6
Chordata	Teleostei	Gadiformes	Gadidae	Raniceps raninus	G6
Chordata	Teleostei	Gadiformes	Gadidae	Trisopterus luscus	G6
Chordata	Teleostei	Gobiiformes	Eleotridae	Mogurnda adspersa	G5
Chordata	Teleostei	Gobiiformes	Gobiidae	Aphia minuta	G6
Chordata	Teleostei	Gobiiformes	Gobiidae	Crystallogobius linearis	G6
Chordata	Teleostei	Gobiiformes	Gobiidae	Gobius niger	G6
Chordata	Teleostei	Gobiiformes	Gobiidae	Pomatoschistus flavescens	G6
Chordata	Teleostei	Gobiiformes	Gobiidae	Pomatoschistus microps	G5
Chordata	Teleostei	Gobiiformes	Gobiidae	Pomatoschistus pictus	G6
Chordata	Teleostei	Pleuronectiformes	Pleuronectidae	Pleuronichthys cornutus	G6
Chordata	Teleostei	Scombriformes	Scombridae	Scomber scombrus	G6
Cnidaria	Hydrozoa	Anthoathecata	Bougainvilliidae	Bougainvillia muscus	G6
Cnidaria	Hydrozoa	Anthoathecata	Cordylophoridae	Cordylophora caspia*	G6
Cnidaria	Hydrozoa	Anthoathecata	Corynidae	Stauridiosarsia gemmifera	G6
Cnidaria	Hydrozoa	Anthoathecata	Eudendriidae	Eudendrium racemosum	G6
Cnidaria	Hydrozoa	Anthoathecata	Hydractiniidae	Hydractinia echinata	G6
Cnidaria	Hydrozoa	Anthoathecata	Hydractiniidae	Podocoryna exigua	G6
Cnidaria	Hydrozoa	Anthoathecata	Oceaniidae	Turritopsis nutricula	G6
Cnidaria	Hydrozoa	Anthoathecata	Pandeidae	Amphinema dinema	G6
Cnidaria	Hydrozoa	Anthoathecata	Rathkeidae	Lizzia blondina	G7
Cnidaria	Hydrozoa	Anthoathecata	Tubulariidae	Ectopleura marina	G6
Cnidaria	Hydrozoa	Leptothecata	Aglaopheniidae	Aglaophenia pluma	G6
Cnidaria	Hydrozoa	Leptothecata	Aglaopheniidae	Aglaophenia tubiformis	G6
Cnidaria	Hydrozoa	Leptothecata	Campanulariidae	Campanularia hincksii	G6
Cnidaria	Hydrozoa	Leptothecata	Campanulariidae	Clytia gracilis	G6
Cnidaria	Hydrozoa	Leptothecata	Campanulariidae	Clytia hemisphaerica	G7
Cnidaria	Hydrozoa	Leptothecata	Campanulariidae	Clytia paulensis	G6
Cnidaria	Hydrozoa	Leptothecata	Campanulariidae	Obelia dichotoma	G2
Cnidaria	Hydrozoa	Leptothecata	Campanulariidae	Obelia geniculata	G3
Cnidaria	Hydrozoa	Leptothecata	Campanulariidae	Obelia longissima	G6
Cnidaria	Hydrozoa	Leptothecata	Campanulariidae	Orthopyxis everta	G6
Cnidaria	Hydrozoa	Leptothecata	Campanulariidae	Orthopyxis integra	G6
Cnidaria	Hydrozoa	Leptothecata	Haleciidae	Halecium halecinum	G6
Cnidaria	Hydrozoa	Leptothecata	Plumulariidae	Plumularia setacea	G6
Cnidaria	Hydrozoa	Leptothecata	Plumulariidae	Plumularia strictocarpa	G6
Cnidaria	Hydrozoa	Leptothecata	Sertulariidae	Abietinaria filicula	G6
Cnidaria	Hydrozoa	Leptothecata	Sertulariidae	Salacia desmoides	G6
Echinodermata	Echinoidea	Camarodonta	Parechinidae	Paracentrotus lividus	G6
Echinodermata	Echinoidea	Camarodonta	Parechinidae	Psammechinus miliaris	G6
Echinodermata	Echinoidea	Camarodonta	Strongylocentrotidae	Strongylocentrotus purpuratus	G6
Echinodermata	Echinoidea	Spatangoida	Loveniidae	Echinocardium cordatum	G6
Echinodermata	Ophiuroidea	Amphilepidida	Amphiuridae	Acrocnida brachiata	G6
Echinodermata	Ophiuroidea	Amphilepidida	Amphiuridae	Amphiura filiformis	G2
Echinodermata	Ophiuroidea	Amphilepidida	Ophiotrichidae	Ophiothrix (Ophiothrix) oerstedii	G6
Echinodermata	Ophiuroidea	Amphilepidida	Ophiotrichidae	Ophiothrix fragilis	G6
Echinodermata	Ophiuroidea	Ophiacanthida	Ophiodermatidae	Ophioderma cinereum	G6
Echinodermata	Ophiuroidea	Ophiacanthida	Ophiotomidae	Ophiocomina nigra	G7
Entoprocta			Loxosomatidae	Loxosomella stomatophora	G7
Hemichordata	Enteropneusta	[unassigned] Enteropneusta	Ptychoderidae	Balanoglossus clavigerus	G6
Mollusca	Bivalvia	Adapedonta	Hiatellidae	Hiatella arctica	G2
Mollusca	Bivalvia	Arcida	Arcidae	Anadara broughtonii	G6
Mollusca	Bivalvia	Cardiida	Cardiidae	Cerastoderma edule	G5
Mollusca	Bivalvia	Cardiida	Cardiidae	Dallocardia muricata	G6
Mollusca	Bivalvia	Cardiida	Cardiidae	Parvicardium exiguum	G6
Mollusca	Bivalvia	Cardiida	Donacidae	Donax trunculus	G7
Mollusca	Bivalvia	Cardiida	Psammobiidae	Asaphis deflorata	G6
Mollusca	Bivalvia	Cardiida	Solecurtidae	Tagelus californianus	G7
Mollusca	Bivalvia	Galeommatida	Galeommatidae	Galeomma turtoni	G6
Mollusca	Bivalvia	Galeommatida	Lasaeidae	Brachiomya stigmatica	G7
Mollusca	Bivalvia	Galeommatida	Lasaeidae	Koreamya arcuata	G6
Mollusca	Bivalvia	Galeommatida	Lasaeidae	Paraborniola matsumotoi	G4
Mollusca	Bivalvia	Limida	Limidae	Limaria hians	G4
Mollusca	Bivalvia	Myida	Pholadidae	Barnea candida	G6
Mollusca	Bivalvia	Myida	Pholadidae	Pholas dactylus	G6
Mollusca	Bivalvia	Myida	Teredinidae	Nototeredo norvagica	G6
Mollusca	Bivalvia	Mytilida	Mytilidae	Musculus costulatus	G6
Mollusca	Bivalvia	Mytilida	Mytilidae	Musculus lateralis	G4
Mollusca	Bivalvia	Mytilida	Mytilidae	Mytilus edulis	G2
Mollusca	Bivalvia	Ostreida	Ostreidae	Ostrea angasi	G5
Mollusca	Bivalvia	Ostreida	Ostreidae	Saccostrea glomerata	G6
Mollusca	Bivalvia	Ostreida	Pinnidae	Atrina fragilis	G6
Mollusca	Bivalvia	Venerida	Mactridae	Spisula solidissima	G6
Mollusca	Bivalvia	Venerida	Mactridae	Spisula subtruncata	G6
Mollusca	Bivalvia	Venerida	Veneridae	Callista chione	G6
Mollusca	Bivalvia	Venerida	Veneridae	Mercenaria mercenaria*	G6
Mollusca	Bivalvia	Venerida	Veneridae	Petricola lapicida	G6
Mollusca	Bivalvia	Venerida	Veneridae	Ruditapes philippinarum*	G6
Mollusca	Bivalvia	Venerida	Veneridae	Venerupis aspera	G4
Mollusca	Gastropoda	[unassigned] Caenogastropoda	Cerithiidae	Bittium reticulatum	G3
Mollusca	Gastropoda	[unassigned] Caenogastropoda	Cerithiopsidae	Cerithiopsis petanii	G6
Mollusca	Gastropoda	[unassigned] Caenogastropoda	Planaxidae	Planaxis sulcatus	G6
Mollusca	Gastropoda	Cephalaspidea	Cylichnidae	Cylichna cylindracea	G6
Mollusca	Gastropoda	Cephalaspidea	Haminoeidae	Haminoea orbignyana	G6
Mollusca	Gastropoda	Cephalaspidea	Haminoeidae	Haminoea orteai	G4
Mollusca	Gastropoda	Cephalaspidea	Haminoeidae	Lamprohaminoea cymbalum	G6
Mollusca	Gastropoda	Littorinimorpha	Caecidae	Caecum trachea	G6
Mollusca	Gastropoda	Littorinimorpha	Calyptraeidae	Crepidula fornicata*	G6
Mollusca	Gastropoda	Littorinimorpha	Hydrobiidae	Peringia ulvae	G2
Mollusca	Gastropoda	Littorinimorpha	Lironobidae	Merelina tokunagai	G6
Mollusca	Gastropoda	Littorinimorpha	Littorinidae	Littorina littorea	G6
Mollusca	Gastropoda	Littorinimorpha	Rissoidae	Alvania beanii	G6
Mollusca	Gastropoda	Littorinimorpha	Rissoidae	Onoba semicostata	G6
Mollusca	Gastropoda	Littorinimorpha	Triviidae	Trivia monacha	G6
Mollusca	Gastropoda	Neogastropoda	Nassariidae	Ilyanassa obsoleta	G6
Mollusca	Gastropoda	Neogastropoda	Nassariidae	Tritia incrassata	G6
Mollusca	Gastropoda	Neogastropoda	Nassariidae	Tritia nitida	G6
Mollusca	Gastropoda	Neogastropoda	Nassariidae	Tritia reticulata	G5
Mollusca	Gastropoda	Nudibranchia	Aeolidiidae	Aeolidia filomenae	G6
Mollusca	Gastropoda	Nudibranchia	Aeolidiidae	Aeolidiella sanguinea	G6
Mollusca	Gastropoda	Nudibranchia	Aeolidiidae	Spurilla neapolitana	G7
Mollusca	Gastropoda	Nudibranchia	Calmidae	Calma gobioophaga	G6
Mollusca	Gastropoda	Nudibranchia	Cuthonidae	Cuthona nana	G6
Mollusca	Gastropoda	Nudibranchia	Discodorididae	Geitodoris heathi	G6
Mollusca	Gastropoda	Nudibranchia	Discodorididae	Jorunna tomentosa	G4
Mollusca	Gastropoda	Nudibranchia	Dotidae	Doto coronata	G2
Mollusca	Gastropoda	Nudibranchia	Dotidae	Doto koenneckeri	G5
Mollusca	Gastropoda	Nudibranchia	Dotidae	Doto millbayana	G2
Mollusca	Gastropoda	Nudibranchia	Dotidae	Doto pinnatifida	G6
Mollusca	Gastropoda	Nudibranchia	Embletoniidae	Embletonia pulchra	G6
Mollusca	Gastropoda	Nudibranchia	Eubranchidae	Amphorina linensis	G6
Mollusca	Gastropoda	Nudibranchia	Eubranchidae	Capellinia doriae	G6
Mollusca	Gastropoda	Nudibranchia	Eubranchidae	Eubranchus exiguus	G6
Mollusca	Gastropoda	Nudibranchia	Facelinidae	Facelina annulicornis	G6
Mollusca	Gastropoda	Nudibranchia	Facelinidae	Facelina bostoniensis	G6
Mollusca	Gastropoda	Nudibranchia	Facelinidae	Favorinus branchialis	G3
Mollusca	Gastropoda	Nudibranchia	Flabellinidae	Edmundsella pedata	G6
Mollusca	Gastropoda	Nudibranchia	Goniodorididae	Ancula gibbosa	G7
Mollusca	Gastropoda	Nudibranchia	Goniodorididae	Goniodoris castanea	G6
Mollusca	Gastropoda	Nudibranchia	Goniodorididae	Goniodoris nodosa	G6
Mollusca	Gastropoda	Nudibranchia	Hancockiidae	Hancockia uncinata	G6
Mollusca	Gastropoda	Nudibranchia	Onchidorididae	Atalodoris depressa	G6
Mollusca	Gastropoda	Nudibranchia	Onchidorididae	Atalodoris jannae	G6
Mollusca	Gastropoda	Nudibranchia	Polyceridae	Limacia clavigera	G4
Mollusca	Gastropoda	Nudibranchia	Polyceridae	Polycera quadrilineata	G4
Mollusca	Gastropoda	Nudibranchia	Tergipedidae	Tergipes tergipes	G4
Mollusca	Gastropoda	Nudibranchia	Trinchesiidae	Catriona aurantia	G6
Mollusca	Gastropoda	Nudibranchia	Trinchesiidae	Rubramoena amoena	G6
Mollusca	Gastropoda	Nudibranchia	Trinchesiidae	Trinchesia caerulea	G7
Mollusca	Gastropoda	Nudibranchia	Trinchesiidae	Trinchesia cuanensis	G6
Mollusca	Gastropoda	Nudibranchia	Trinchesiidae	Trinchesia foliata	G2
Mollusca	Gastropoda	Siphonariida	Siphonariidae	Siphonaria pectinata	G6
Mollusca	Gastropoda	Trochida	Phasianellidae	Tricolia pullus	G2
Mollusca	Gastropoda	Trochida	Trochidae	Phorcus lineatus	G6
Mollusca	Gastropoda	Trochida	Trochidae	Steromphala pennanti	G5
Mollusca	Gastropoda	Trochida	Trochidae	Steromphala umbilicalis	G5
Mollusca	Gastropoda		Hedylopsidae	Hedylopsis spiculifera	G6
Mollusca	Gastropoda		Hermaeidae	Aplysiopsis minor	G6
Mollusca	Gastropoda		Limapontiidae	Calliopaea bellula	G4
Mollusca	Gastropoda		Limapontiidae	Ercolania felina	G1
Mollusca	Gastropoda		Limapontiidae	Limapontia capitata	G3
Mollusca	Gastropoda		Limapontiidae	Limapontia depressa	G1
Mollusca	Gastropoda		Limapontiidae	Placida cremoniana	G6
Mollusca	Gastropoda		Limapontiidae	Placida dendritica	G6
Mollusca	Gastropoda		Parhedylidae	Microhedyle glandulifera	G4
Mollusca	Gastropoda		Patellidae	Patella pellucida	G7
Mollusca	Gastropoda		Patellidae	Patella ulyssiponensis	G6
Mollusca	Gastropoda		Patellidae	Patella vulgata	G7
Mollusca	Gastropoda		Plakobranchidae	Bosellia mimetica	G4
Mollusca	Gastropoda		Plakobranchidae	Elysia viridis	G4
Mollusca	Gastropoda		Planorbidae	Biomphalaria glabrata	G6
Mollusca	Gastropoda		Pyramidellidae	Eulimella ventricosa	G6
Mollusca	Gastropoda		Pyramidellidae	Turbonilla lactea	G4
Mollusca	Polyplacophora	Chitonida	Acanthochitonidae	Acanthochitona crinita	G6
Nematoda	Chromadorea	Chromadorida	Cyatholaimidae	Paracyatholaimus intermedius	G6
Nematoda	Chromadorea	Desmodorida	Desmodoridae	Spirinia parasitifera	G6
Nematoda	Chromadorea	Rhabditida	Cucullanidae	Cucullanus heterodonti	G6
Nematoda	Chromadorea	Rhabditida	Rhabditidae	Litoditis marina	G6
Nemertea	Hoplonemertea	Monostilifera	Emplectonematidae	Emplectonema gracile	G6
Nemertea	Hoplonemertea	Monostilifera	Oerstediidae	Oerstedia dorsalis	G6
Nemertea	Palaeonemertea	Archinemertea	Cephalotrichidae	Cephalothrix hongkongiensis	G6
Nemertea	Palaeonemertea	Archinemertea	Cephalotrichidae	Cephalothrix rufifrons	G6
Phoronida			Phoronidae	Phoronis emigi	G4
Platyhelminthes		Polycladida	Euryleptidae	Prostheceraeus vittatus	G6
Platyhelminthes		Polycladida	Notoplanidae	Notoplana australis	G4
Platyhelminthes		Polycladida	Planoceridae	Paraplanocera oligoglena	G6
Platyhelminthes		Prolecithophora	Plagiostomidae	Vorticeros auriculatum	G6
Platyhelminthes		Prolecithophora	Protomonotresidae	Protomonotresis centrophora	G6
Platyhelminthes		Rhabdocoela	Placorhynchidae	Placorhynchus dimorphis	G6
Platyhelminthes		Rhabdocoela	Placorhynchidae	Placorhynchus octaculeatus	G6
Platyhelminthes		Rhabdocoela	Provorticidae	Provortex balticus	G6
Porifera	Demospongiae	Dictyoceratida	Dysideidae	Lamellodysidea herbacea	G6
Porifera	Demospongiae	Poecilosclerida	Desmoxyidae	Desmoxya pelagiae	G6
Porifera	Demospongiae	Poecilosclerida	Mycalidae	Mycale (Carmia) sanguinea	G6
Porifera	Demospongiae	Suberitida	Halichondriidae	Halichondria (Halichondria) bowerbanki	G6
Porifera	Demospongiae	Suberitida	Halichondriidae	Hymeniacidon perlevis	G6

## Sheet: Table S7
Table S7. Compiled list of zooplankton (Z) and macrozoobenthos (M) species reported from previous morphology-based studies, as well as which marker detected them in the current study.
Phylum	Class	Order	Family	Species	Z/M	References	COI	18S		Bibliography for Tabla S4
Annelida	Polychaeta	Eunicida	Onuphidae	Diopatra neapolitana	M	[12] [15]				1	APA - Agência Portuguesa do Ambiente (2010).
Annelida	Polychaeta	Phyllodocida	Glyceridae	Glycera tridactyla	M	[1] [2] [12] [13] [15]				2	Azevedo, I., Ramos, S., Mucha, A. P., & Bordalo, A. A. (2013). Applicability of ecological assessment tools for management decision-making: a case study from the Lima estuary (NW Portugal). Ocean & coastal management, 72, 54-63.
Annelida	Polychaeta	Phyllodocida	Hesionidae	Psamathe fusca	M	[12] [15]				3	Cortes, R. M. V., Ferreira, M. T., Oliveira, S. V., & Oliveira, D. (2002). Macroinvertebrate community structure in a regulated river segment with different flow conditions. River Research and Applications, 18(4), 367-382.
Annelida	Polychaeta	Phyllodocida	Nephtyidae	Nephtys cirrosa	M	[12] [13] [15]				4	Fidalgo, M. L., & Gerhardt, A. (2002). Distribution of the freshwater shrimp, Atyaephyra desmarestii (Millet, 1831) in Portugal (Decapoda, Natantia). Crustaceana, 1375-1385.
Annelida	Polychaeta	Phyllodocida	Nephtyidae	Nephtys hombergii	M	[12] [13] [15]	X			5	Mendes, C., Ramos, S., & Bordalo, A. A. (2014). Feeding ecology of juvenile flounder Platichthys flesus in an estuarine nursery habitat: Influence of prey–predator interactions. Journal of experimental marine biology and ecology, 461, 458-468.
Annelida	Polychaeta	Phyllodocida	Nereididae	Alitta succinea	M	[12] [15]				6	Ramos, S., Cowen, R. K., Ré, P., & Bordalo, A. A. (2006). Temporal and spatial distributions of larval fish assemblages in the Lima estuary (Portugal). Estuarine, Coastal and Shelf Science, 66(1-2), 303-314.
Annelida	Polychaeta	Phyllodocida	Nereididae	Hediste diversicolor	M	[1] [2] [12] [13] [15]				7	Ramos, S., Ré, P., & Bordalo, A. A. (2010). Recruitment of flatfish species to an estuarine nursery habitat (Lima estuary, NW Iberian Peninsula). Journal of Sea Research, 64(4), 473-486.
Annelida	Polychaeta	Phyllodocida	Nereididae	Micronereis variegata	M	[12] [15]				8	Ramos, S., Cabral, H., & Elliott, M. (2015). Do fish larvae have advantages over adults and other components for assessing estuarine ecological quality?. Ecological Indicators, 55, 74-85.
Annelida	Polychaeta	Phyllodocida	Nereididae	Perinereis cultrifera	M	[12] [15]				9	Rubal, M., Maldre, K., Sousa-Pinto, I., & Veiga, P. (2021). Current distribution and abundance of Austrominius modestus (Darwin, 1854) and other non-indigenous barnacles along the northern coast of Portugal. Regional Studies in Marine Science, 41, 101586.
Annelida	Polychaeta	Phyllodocida	Phyllodocidae	Eteone longa	M	[12] [13] [15]		X		10	Sampaio, E. A. S. (2012). Comparação da diversidade e estrutura das comunidades de macroinvertebrados betónicos associados ao bio invasor Corbicula fluminea na área estuarina de água doce nos rios Minho e Lima.
Annelida	Polychaeta	Phyllodocida	Phyllodocidae	Eumida sanguinea	M	[18]				11	Sampaio, E., & Rodil, I. F. (2014). Effects of the invasive clam Corbicula fluminea (Müller, 1774) on a representative macrobenthic community from two estuaries at different stages of invasion. Limnetica, 33(2), 249-262.
Annelida	Polychaeta	Phyllodocida	Phyllodocidae	Mysta picta	M	[1]				12	Sousa, R. G. D. (2003). Estruturas das comunidades de macroinvertebrados bentónicos presentes no estuário do Rio Lima.
Annelida	Polychaeta	Phyllodocida	Phyllodocidae	Phyllodoce longipes	M	[1]				13	Sousa, R., Dias, S., & Antunes, J. C. (2006). Spatial subtidal macrobenthic distribution in relation to abiotic conditions in the Lima estuary, NW of Portugal. Hydrobiologia, 559(1), 135-148.
Annelida	Polychaeta	Phyllodocida	Sigalionidae	Pholoe inornata	M	[1]	X			14	Sousa, R., Antunes, C., & Guilhermino, L. (2006). Factors influencing the occurrence and distribution of Corbicula fluminea (Müller, 1774) in the River Lima estuary. In Annales de Limnologie-International Journal of Limnology (Vol. 42, No. 3, pp. 165-171). EDP Sciences.
Annelida	Polychaeta	Phyllodocida	Syllidae	Exogone verugera	M	[12] [13]				15	Sousa, R., Dias, S., & Antunes, C. (2007). Subtidal macrobenthic structure in the lower Lima estuary, NW of Iberian Peninsula. In Annales Zoologici Fennici (pp. 303-313). Finnish Zoological and Botanical Publishing Board.
Annelida	Polychaeta	Sabellida	Sabellidae	Pseudopotamilla reniformis	M	[2]				16	Vieira, L. R., Guilhermino, L., & Morgado, F. (2015). Zooplankton structure and dynamics in two estuaries from the Atlantic coast in relation to multi-stressors exposure. Estuarine, Coastal and Shelf Science, 167, 347-367.
Annelida	Polychaeta	Spionida	Spionidae	Malacoceros fuliginosus	M	[12] [15]		X		17	Conde, A., Aira, M., Novais, J. M., & Domínguez, J. (2011). On an early record of the alien clam Mya arenaria in the Iberian Peninsula and its likely confusion with Scrobicularia plana (Bivalvia). Vie et Milieu - Life and Environment, 61(3), 151-157.
Annelida	Polychaeta	Spionida	Spionidae	Polydora ciliata	M	[12] [15]				18	Duarte, S., Vieira, P. E., Leite, B. R., Teixeira, M. A. L., Neto, J. N., Costa, F. O. (2023). Macrozoobenthos monitoring in Portuguese transitional waters in the scope of the water framework directive using morphology and DNA metabarcoding. Estuarine, Coastal and Shelf Science, 281.
Annelida	Polychaeta	Spionida	Spionidae	Pygospio elegans	M	[17]
Annelida	Polychaeta	Spionida	Spionidae	Scolelepis foliosa	M	[12] [15]
Annelida	Polychaeta	Spionida	Spionidae	Streblospio shrubsolii	M	[1] [13]
Annelida	Polychaeta	Terebellida	Ampharetidae	Alkmaria romijn	M	[17]
Annelida	Polychaeta	Terebellida	Ampharetidae	Ampharete acutifrons	M	[12] [13] [15]
Annelida	Polychaeta	Terebellida	Cirratulidae	Aphelochaeta marioni	M	[2] [12] [15]
Annelida	Polychaeta	Terebellida	Cirratulidae	Cirriformia tentaculata	M	[12]
Annelida	Polychaeta	Terebellida	Melinnidae	Melinna palmata	M	[12] [13] [15]
Annelida	Polychaeta	Terebellida	Pectinariidae	Lagis koreni	M	[1] [2] [12] [13] [15]	X	X
Annelida	Polychaeta	Terebellida	Terebellidae	Amphitritides gracilis	M	[12] [15]
Annelida	Polychaeta	Terebellida	Terebellidae	Lanice conchilega	Z and M	[1] [16]	X
Annelida	Polychaeta		Capitellidae	Capitella capitata	M	[1] [12] [13] [15]	X
Annelida	Polychaeta		Capitellidae	Heteromastus filiformis	M	[1] [12] [13] [15]
Annelida	Polychaeta		Capitellidae	Mediomastus fragilis	M	[1]
Annelida	Polychaeta		Chaetopteridae	Chaetopterus variopedatus	M	[12] [15]
Annelida	Polychaeta		Magelonidae	Magelona johnstoni	M	[18]
Annelida	Polychaeta		Magelonidae	Magelona mirabilis	Z	[16]	X	X
Annelida	Polychaeta		Maldanidae	Euclymene lombricoides	M	[12] [13] [15]
Annelida	Polychaeta		Maldanidae	Maldane sarsi	M	[12] [13] [15]
Annelida	Polychaeta		Oweniidae	Owenia fusiformis	M	[1] [2] [12] [15]	X
Arthropoda	Branchiopoda	Anomopoda	Bosminidae	Bosmina (Bosmina) longirostris	Z	[16]
Arthropoda	Branchiopoda	Anomopoda	Daphniidae	Ceriodaphnia reticulata	Z	[16]
Arthropoda	Branchiopoda	Anomopoda	Daphniidae	Daphnia longispina	Z	[16]
Arthropoda	Branchiopoda	Anomopoda	Daphniidae	Daphnia pulex	Z	[16]
Arthropoda	Branchiopoda	Ctenopoda	Sididae	Penilia avirostris	Z	[16]	X	X
Arthropoda	Branchiopoda	Ctenopoda	Sididae	Sida crystallina	Z	[16]
Arthropoda	Branchiopoda	Onychopoda	Podonidae	Evadne nordmanni	Z	[16]	X
Arthropoda	Branchiopoda	Onychopoda	Podonidae	Evadne spinifera	Z	[16]
Arthropoda	Branchiopoda	Onychopoda	Podonidae	Pleopis polyphemoides	Z	[16]	X
Arthropoda	Branchiopoda	Onychopoda	Podonidae	Podon intermedius	Z	[16]	X
Arthropoda	Branchiopoda	Onychopoda	Podonidae	Podon leuckartii	Z	[16]
Arthropoda	Hexanauplia	Calanoida	Acartiidae	Acartia (Acanthacartia) tonsa	Z	[16]
Arthropoda	Hexanauplia	Calanoida	Acartiidae	Acartia (Acartiura) clausi	Z	[16]	X
Arthropoda	Hexanauplia	Calanoida	Calanidae	Calanus helgolandicus	Z	[16]
Arthropoda	Hexanauplia	Calanoida	Candaciidae	Candacia armata	Z	[16]
Arthropoda	Hexanauplia	Calanoida	Centropagidae	Centropages chierchiae	Z	[16]
Arthropoda	Hexanauplia	Calanoida	Centropagidae	Centropages hamatus	Z	[16]
Arthropoda	Hexanauplia	Calanoida	Centropagidae	Centropages typicus	Z	[16]	X	X
Arthropoda	Hexanauplia	Calanoida	Clausocalanidae	Clausocalanus arcuicornis	Z	[16]
Arthropoda	Hexanauplia	Calanoida	Clausocalanidae	Pseudocalanus elongatus	Z	[16]	X
Arthropoda	Hexanauplia	Calanoida	Euchaetidae	Paraeuchaeta hebes	Z	[16]
Arthropoda	Hexanauplia	Calanoida	Paracalanidae	Paracalanus parvus parvus	Z	[16]
Arthropoda	Hexanauplia	Calanoida	Pseudodiaptomidae	Calanipeda aquaedulcis	Z	[16]
Arthropoda	Hexanauplia	Calanoida	Temoridae	Temora longicornis	Z	[16]	X	X
Arthropoda	Hexanauplia	Calanoida	Temoridae	Temora stylifera	Z	[16]	X
Arthropoda	Hexanauplia	Cyclopoida	Corycaeidae	Ditrichocorycaeus anglicus	Z	[16]	X
Arthropoda	Hexanauplia	Cyclopoida	Oithonidae	Oithona nana	Z	[16]
Arthropoda	Hexanauplia	Cyclopoida	Oithonidae	Oithona plumifera	Z	[16]
Arthropoda	Hexanauplia	Cyclopoida	Oithonidae	Oithona similis	Z	[16]
Arthropoda	Hexanauplia	Harpacticoida	Tachidiidae	Euterpina acutifrons	Z	[16]	X
Arthropoda	Hexanauplia	Siphonostomatoida	Caligidae	Caligus elongatus	Z	[16]
Arthropoda	Malacostraca	Cumacea	Diastylidae	Diastylis bradyi	M	[18]
Arthropoda	Malacostraca	Decapoda	Atelecyclidae	Atelecyclus rotundatus	M	[12] [13] [15]
Arthropoda	Malacostraca	Decapoda	Atyidae	Atyaephyra desmarestii	M	[4]
Arthropoda	Malacostraca	Decapoda	Carcinidae	Carcinus maenas	Z and M	[1] [12] [13] [15] [16]	X	X
Arthropoda	Malacostraca	Decapoda	Crangonidae	Crangon crangon	Z and M	[1] [2] [12] [13] [15] [16]	X
Arthropoda	Malacostraca	Decapoda	Diogenidae	Diogenes pugilator	Z and M	[12] [13] [15] [16]
Arthropoda	Malacostraca	Decapoda	Grapsidae	Pachygrapsus marmoratus	Z	[16]	X
Arthropoda	Malacostraca	Decapoda	Paguridae	Anapagurus laevis	M	[12] [15]
Arthropoda	Malacostraca	Decapoda	Paguridae	Pagurus bernhardus	Z	[16]
Arthropoda	Malacostraca	Decapoda	Paguridae	Pagurus pubescens	M	[1]
Arthropoda	Malacostraca	Decapoda	Palaemonidae	Palaemon elegans	Z and M	[12] [15] [16]
Arthropoda	Malacostraca	Decapoda	Palaemonidae	Palaemon serratus	Z	[16]
Arthropoda	Malacostraca	Decapoda	Polybiidae	Liocarcinus holsatus	M	[12] [15]
Arthropoda	Malacostraca	Decapoda	Polybiidae	Liocarcinus navigator	M	[12] [15]	X
Arthropoda	Malacostraca	Decapoda	Polybiidae	Necora puber	M	[1]	X
Arthropoda	Malacostraca	Decapoda	Porcellanidae	Pisidia bluteli	M	[18]
Arthropoda	Malacostraca	Decapoda	Porcellanidae	Pisidia longicornis	Z	[16]	X
Arthropoda	Malacostraca	Decapoda	Porcellanidae	Porcellana platycheles	Z	[16]	X
Arthropoda	Malacostraca	Decapoda	Upogebiidae	Upogebia pusilla	Z	[16]
Arthropoda	Malacostraca	Isopoda	Gnathiidae	Paragnathia formica	Z and M	[1] [16]
Arthropoda	Malacostraca	Isopoda	Idoteidae	Idotea chelipes	Z and M	[12] [15] [16]
Arthropoda	Malacostraca	Mysida	Mysidae	Acanthomysis longicornis	M	[1]
Arthropoda	Malacostraca	Mysida	Mysidae	Gastrosaccus spinifer	Z and M	[1] [16]
Arthropoda	Malacostraca	Mysida	Mysidae	Mesopodopsis slabberi	Z	[16]
Arthropoda	Malacostraca	Mysida	Mysidae	Neomysis integer	Z and M	[1] [16]	X	X
Arthropoda	Malacostraca	Mysida	Mysidae	Schistomysis spiritus	Z	[16]
Arthropoda	Thecostraca	Balanomorpha	Elminiidae	Austrominius modestus	M	[9]	X
Arthropoda	Thecostraca	Pollicipedomorpha	Pollicipedidae	Pollicipes pollicipes	M	[12] [15]		X
Chaetognatha	Sagittoidea	Aphragmophora	Sagittidae	Parasagitta friderici	Z	[16]		X
Chaetognatha	Sagittoidea	Aphragmophora	Sagittidae	Parasagitta setosa	Z	[16]
Chordata	Actinopteri	Atheriniformes	Atherinidae	Atherina presbyter	Z	[6] [8] [16]
Chordata	Actinopteri	Beloniformes	Belonidae	Belone belone	Z	[16]
Chordata	Actinopteri	Blenniiformes	Blenniidae	Blennius ocellaris	Z	[16]
Chordata	Actinopteri	Blenniiformes	Blenniidae	Coryphoblennius galerita	Z	[6] [8]
Chordata	Actinopteri	Blenniiformes	Blenniidae	Lipophrys pholis	Z	[6] [8] [16]	X
Chordata	Actinopteri	Blenniiformes	Blenniidae	Parablennius gattorugine	Z	[6] [16]
Chordata	Actinopteri	Callionymiformes	Callionymidae	Callionymus lyra	Z	[6]	X
Chordata	Actinopteri	Carangiformes	Carangidae	Trachurus trachurus	Z	[6]
Chordata	Actinopteri	Clupeiformes	Clupeidae	Sardina pilchardus	Z	[6] [8] [16]
Chordata	Actinopteri	Clupeiformes	Clupeidae	Sprattus sprattus	Z	[16]
Chordata	Actinopteri	Clupeiformes	Engraulidae	Engraulis encrasicolus	Z	[6] [8] [16]
Chordata	Actinopteri	Eupercaria incertae sedis	Labridae	Centrolabrus exoletus	Z	[6]
Chordata	Actinopteri	Eupercaria incertae sedis	Labridae	Ctenolabrus rupestris	Z	[6] [8]	X
Chordata	Actinopteri	Eupercaria incertae sedis	Labridae	Labrus bergylta	Z	[6] [8] [16]
Chordata	Actinopteri	Eupercaria incertae sedis	Labridae	Labrus merula	Z	[8]
Chordata	Actinopteri	Eupercaria incertae sedis	Labridae	Symphodus melops	Z	[6] [8] [16]
Chordata	Actinopteri	Eupercaria incertae sedis	Moronidae	Dicentrarchus labrax	Z	[6] [8]		X
Chordata	Actinopteri	Eupercaria incertae sedis	Sparidae	Diplodus sargus	Z	[6]
Chordata	Actinopteri	Eupercaria incertae sedis	Sparidae	Spondyliosoma cantharus	Z	[6]
Chordata	Actinopteri	Gadiformes	Gadidae	Trisopterus luscus	Z	[6] [8]	X
Chordata	Actinopteri	Gadiformes	Lotidae	Ciliata mustela	Z	[6] [8]
Chordata	Actinopteri	Gobiesociformes	Gobiesocidae	Diplecogaster bimaculata	Z	[6]
Chordata	Actinopteri	Gobiesociformes	Gobiesocidae	Lepadogaster lepadogaster	Z	[6]
Chordata	Actinopteri	Gobiiformes	Gobiidae	Crystallogobius linearis	Z	[6]	X
Chordata	Actinopteri	Gobiiformes	Gobiidae	Pomatoschistus microps	Z	[8]	X
Chordata	Actinopteri	Gobiiformes	Gobiidae	Pomatoschistus minutus	Z	[8]
Chordata	Actinopteri	Gobiiformes	Gobiidae	Pomatoschistus pictus	Z	[8]	X
Chordata	Actinopteri	Perciformes	Ammodytidae	Ammodytes tobianus	Z	[16]
Chordata	Actinopteri	Perciformes	Ammodytidae	Hyperoplus lanceolatus	Z	[6] [8]
Chordata	Actinopteri	Perciformes	Liparidae	Liparis montagui	Z	[6] [8]
Chordata	Actinopteri	Perciformes	Trachinidae	Echiichthys vipera	Z	[6]
Chordata	Actinopteri	Perciformes	Trachinidae	Trachinus draco	Z	[6]
Chordata	Actinopteri	Pleuronectiformes	Pleuronectidae	Platichthys flesus	Z	[6] [7] [8] [16]
Chordata	Actinopteri	Pleuronectiformes	Scophthalmidae	Zeugopterus punctatus	Z	[6] [7]
Chordata	Actinopteri	Pleuronectiformes	Soleidae	Buglossidium luteum	Z	[6] [7]
Chordata	Actinopteri	Pleuronectiformes	Soleidae	Microchirus variegatus	Z	[6] [7]
Chordata	Actinopteri	Pleuronectiformes	Soleidae	Pegusa lascaris	Z	[6] [7]
Chordata	Actinopteri	Pleuronectiformes	Soleidae	Solea senegalensis	Z	[6] [7] [8] [16]
Chordata	Actinopteri	Pleuronectiformes	Soleidae	Solea solea	Z	[6] [7] [16]
Chordata	Actinopteri	Syngnathiformes	Syngnathidae	Entelurus aequoreus	Z	[6]
Chordata	Actinopteri	Syngnathiformes	Syngnathidae	Nerophis lumbriciformis	Z	[6]
Chordata	Actinopteri	Syngnathiformes	Syngnathidae	Nerophis ophidion	Z	[6]
Chordata	Actinopteri	Syngnathiformes	Syngnathidae	Syngnathus abaster	Z	[6]
Chordata	Actinopteri	Syngnathiformes	Syngnathidae	Syngnathus acus	Z	[6] [8]
Chordata	Appendicularia	Copelata	Oikopleuridae	Oikopleura (Coecaria) longicauda	Z	[16]
Chordata	Appendicularia	Copelata	Oikopleuridae	Oikopleura (Vexillaria) dioica	Z	[16]
Cnidaria	Anthozoa	Actiniaria	Sagartiidae	Cylista troglodytes	M	[1]
Cnidaria	Hydrozoa	Anthoathecata	Corynidae	Codonium proliferum	Z	[16]
Cnidaria	Hydrozoa	Anthoathecata	Corynidae	Sarsia tubulosa	Z	[16]
Cnidaria	Hydrozoa	Anthoathecata	Corynidae	Stauridiosarsia gemmifera	Z	[16]	X	X
Cnidaria	Hydrozoa	Anthoathecata	Hydractiniidae	Podocoryna carnea	Z	[16]
Cnidaria	Hydrozoa	Anthoathecata	Hydractiniidae	Podocorynoides minima	Z	[16]
Cnidaria	Hydrozoa	Anthoathecata	Rathkeidae	Lizzia blondina	Z	[16]	X	X
Cnidaria	Hydrozoa	Leptothecata	Campanulariidae	Clytia hemisphaerica	Z	[16]	X	X
Cnidaria	Hydrozoa	Leptothecata	Campanulariidae	Clytia islandica	Z	[16]
Cnidaria	Hydrozoa	Leptothecata	Phialellidae	Phialella quadrata	Z	[16]
Cnidaria	Hydrozoa	Limnomedusae	Geryoniidae	Liriope tetraphylla	Z	[16]
Cnidaria	Hydrozoa	Siphonophorae	Diphyidae	Diphyes dispar	Z	[16]
Cnidaria	Hydrozoa	Siphonophorae	Diphyidae	Muggiaea atlantica	Z	[16]
Echinodermata	Asteroidea	Forcipulatida	Asteriidae	Asterias rubens	M	[12] [15]
Echinodermata	Echinoidea	Camarodonta	Parechinidae	Paracentrotus lividus	M	[12] [13] [15]	X
Echinodermata	Echinoidea	Spatangoida	Loveniidae	Echinocardium cordatum	Z and M	[12] [15] [16]	X
Echinodermata	Ophiuroidea	Amphilepidida	Amphiuridae	Amphiura filiformis	M	[12] [15]	X
Echinodermata	Ophiuroidea	Amphilepidida	Ophiotrichidae	Ophiothrix fragilis	Z	[16]	X
Mollusca	Bivalvia	Adapedonta	Hiatellidae	Hiatella arctica	M	[1]	X	X
Mollusca	Bivalvia	Adapedonta	Pharidae	Ensis ensis	M	[12] [15]
Mollusca	Bivalvia	Adapedonta	Pharidae	Ensis siliqua	M	[12] [15]
Mollusca	Bivalvia	Adapedonta	Pharidae	Pharus legumen	M	[1] [12] [13] [15]
Mollusca	Bivalvia	Adapedonta	Solenidae	Solen capensis	M	[12] [15]
Mollusca	Bivalvia	Cardiida	Cardiidae	Acanthocardia tuberculata	M	[12] [15]
Mollusca	Bivalvia	Cardiida	Cardiidae	Cerastoderma edule	M	[2] [12] [13] [15]		X
Mollusca	Bivalvia	Cardiida	Cardiidae	Parvicardium pinnulatum	M	[1]
Mollusca	Bivalvia	Cardiida	Semelidae	Abra alba	M	[1] [2] [12] [13] [15]
Mollusca	Bivalvia	Cardiida	Semelidae	Abra nitida	M	[1]
Mollusca	Bivalvia	Cardiida	Semelidae	Abra tenuis	M	[2] [12] [15]
Mollusca	Bivalvia	Cardiida	Semelidae	Scrobicularia plana	M	[1] [2] [12] [13] [15]
Mollusca	Bivalvia	Cardiida	Tellinidae	Macomangulus tenuis	M	[12] [13] [15]
Mollusca	Bivalvia	Cardiida	Tellinidae	Moerella donacina	M	[1]
Mollusca	Bivalvia	Galeommatida	Lasaeidae	Kurtiella bidentata	M	[1] [12] [13] [15]
Mollusca	Bivalvia	Galeommatida	Lasaeidae	Tellimya ferruginosa	M	[12] [13] [15]
Mollusca	Bivalvia	Lucinida	Lucinidae	Loripes orbiculatus	M	[1] [12] [15]
Mollusca	Bivalvia	Myida	Corbulidae	Varicorbula gibba	M	[12] [15]
Mollusca	Bivalvia	Myida	Myidae	Mya arenaria	M	[12] [15]
Mollusca	Bivalvia	Mytilida	Mytilidae	Mytilus galloprovincialis	M	[12] [13] [15]
Mollusca	Bivalvia	Nuculida	Nuculidae	Nucula nucleus	M	[1] [12] [13] [15]
Mollusca	Bivalvia	Venerida	Cyrenidae	Corbicula fluminea	M	[1] [10] [11] [12] [13] [14] [15]
Mollusca	Bivalvia	Venerida	Mactridae	Lutraria bruuni	M	[12] [13] [15]
Mollusca	Bivalvia	Venerida	Mactridae	Lutraria lutraria	M	[12] [15]
Mollusca	Bivalvia	Venerida	Mactridae	Mactra stultorum	M	[1]
Mollusca	Bivalvia	Venerida	Mactridae	Spisula solida	M	[12] [13] [15]
Mollusca	Bivalvia	Venerida	Mactridae	Spisula subtruncata	M	[12] [15]	X
Mollusca	Bivalvia	Venerida	Mesodesmatidae	Donacilla cornea	M	[12] [15]
Mollusca	Bivalvia	Venerida	Veneridae	Dosinia exoleta	M	[12] [15]
Mollusca	Bivalvia	Venerida	Veneridae	Polititapes rhomboides	M	[12] [13] [15]
Mollusca	Bivalvia	Venerida	Veneridae	Ruditapes decussatus	M	[12] [13] [15]
Mollusca	Bivalvia	Venerida	Veneridae	Venerupis corrugata	M	[1] [12] [13] [15]
Mollusca	Gastropoda	[unassigned] Caenogastropoda	Cerithiidae	Bittium reticulatum	M	[12] [15]	X
Mollusca	Gastropoda	Cephalaspidea	Bullidae	Bulla striata	M	[12] [15]
Mollusca	Gastropoda	Cephalaspidea	Cylichnidae	Cylichna cylindracea	M	[1]		X
Mollusca	Gastropoda	Littorinimorpha	Hydrobiidae	Peringia ulvae	Z and M	[1] [2] [12] [13] [15] [16]	X	X
Mollusca	Gastropoda	Littorinimorpha	Littorinidae	Littorina littorea	Z	[16]	X
Mollusca	Gastropoda	Neogastropoda	Nassariidae	Tritia incrassata	M	[1] [2] [12] [13] [15]	X
Mollusca	Gastropoda	Neogastropoda	Nassariidae	Tritia nitida	M	[12] [13] [15]	X
Mollusca	Gastropoda	Neogastropoda	Nassariidae	Tritia reticulata	M	[1] [2] [12] [13] [15]	X
Mollusca	Gastropoda	Nudibranchia	Aeolidiidae	Aeolidia papillosa	M	[12] [15]
Mollusca	Gastropoda	Nudibranchia	Trinchesiidae	Tenellia adspersa	M	[12] [15]
Mollusca	Gastropoda		Pyramidellidae	Turbonilla lactea	M	[12] [15]		X
Platyhelminthes		Polycladida	Pleioplanidae	Notoplana atomata	M	[1]

## Sheet: Table S8
Table S8. List of the species detected in the current study, with associated marker recovery, and notes on the reliability of the detection.
Phylum	Class	Order	Family	Species	Detected w/ COI	Detected w/ 18S	Notes
Arthropoda	Arachnida	Trombidiformes	Halacaridae	Halacaroides antoniazziae		X	Uncertainity with current data
Chordata	Ascidiacea	Aplousobranchia	Holozoidae	Distaplia dubia		X	Uncertainity with current data
Chordata	Ascidiacea	Phlebobranchia	Ascidiidae	Ascidiella scabra	X		Reliable according to current available data
Chordata	Ascidiacea	Phlebobranchia	Cionidae	Ciona intestinalis*		X	Reliable according to current available data
Chordata	Ascidiacea	Stolidobranchia	Pyuridae	Microcosmus squamiger*		X	Uncertainity with current data
Chordata	Ascidiacea	Stolidobranchia	Styelidae	Styela plicata*		X	Uncertainity with current data
Mollusca	Bivalvia	Adapedonta	Hiatellidae	Hiatella arctica	X	X	Reliable according to current available data
Mollusca	Bivalvia	Arcida	Arcidae	Anadara broughtonii		X	Uncertainity with current data
Mollusca	Bivalvia	Cardiida	Cardiidae	Cerastoderma edule		X	Reliable according to current available data
Mollusca	Bivalvia	Cardiida	Cardiidae	Dallocardia muricata		X	Reliable according to current available data
Mollusca	Bivalvia	Cardiida	Cardiidae	Parvicardium exiguum		X	Reliable according to current available data
Mollusca	Bivalvia	Cardiida	Donacidae	Donax trunculus		X	Uncertainity with current data
Mollusca	Bivalvia	Cardiida	Psammobiidae	Asaphis deflorata		X	Uncertainity with current data
Mollusca	Bivalvia	Cardiida	Solecurtidae	Tagelus californianus		X	Uncertainity with current data
Mollusca	Bivalvia	Galeommatida	Galeommatidae	Galeomma turtoni		X	Uncertainity with current data
Mollusca	Bivalvia	Galeommatida	Lasaeidae	Brachiomya stigmatica		X	Uncertainity with current data
Mollusca	Bivalvia	Galeommatida	Lasaeidae	Koreamya arcuata		X	Uncertainity with current data
Mollusca	Bivalvia	Galeommatida	Lasaeidae	Paraborniola matsumotoi		X	Uncertainity with current data
Mollusca	Bivalvia	Limida	Limidae	Limaria hians		X	Reliable according to current available data
Mollusca	Bivalvia	Myida	Pholadidae	Barnea candida		X	Uncertainity with current data
Mollusca	Bivalvia	Myida	Pholadidae	Pholas dactylus		X	Reliable according to current available data
Mollusca	Bivalvia	Myida	Teredinidae	Nototeredo norvagica		X	Uncertainity with current data
Mollusca	Bivalvia	Mytilida	Mytilidae	Musculus costulatus	X		Reliable according to current available data
Mollusca	Bivalvia	Mytilida	Mytilidae	Musculus lateralis		X	Reliable according to current available data
Mollusca	Bivalvia	Mytilida	Mytilidae	Mytilus edulis	X	X	Reliable according to current available data
Mollusca	Bivalvia	Ostreida	Ostreidae	Ostrea angasi	X		Reliable according to current available data
Mollusca	Bivalvia	Ostreida	Ostreidae	Saccostrea glomerata		X	Uncertainity with current data
Mollusca	Bivalvia	Ostreida	Pinnidae	Atrina fragilis	X		Reliable according to current available data
Mollusca	Bivalvia	Venerida	Mactridae	Spisula solidissima		X	Uncertainity with current data
Mollusca	Bivalvia	Venerida	Mactridae	Spisula subtruncata	X		Reliable according to current available data
Mollusca	Bivalvia	Venerida	Veneridae	Callista chione		X	Uncertainity with current data
Mollusca	Bivalvia	Venerida	Veneridae	Mercenaria mercenaria*		X	Uncertainity with current data
Mollusca	Bivalvia	Venerida	Veneridae	Petricola lapicida		X	Uncertainity with current data
Mollusca	Bivalvia	Venerida	Veneridae	Ruditapes philippinarum*	X		Reliable according to current available data
Mollusca	Bivalvia	Venerida	Veneridae	Venerupis aspera		X	Uncertainity with current data
Arthropoda	Branchiopoda	Ctenopoda	Holopediidae	Holopedium gibberum	X		Reliable according to current available data
Arthropoda	Branchiopoda	Ctenopoda	Sididae	Penilia avirostris	X	X	Reliable according to current available data (COI and 18S)
Arthropoda	Branchiopoda	Onychopoda	Podonidae	Evadne nordmanni	X		Reliable according to current available data
Arthropoda	Branchiopoda	Onychopoda	Podonidae	Pleopis polyphemoides	X		Reliable according to current available data
Arthropoda	Branchiopoda	Onychopoda	Podonidae	Podon intermedius	X		Reliable according to current available data
Nematoda	Chromadorea	Chromadorida	Cyatholaimidae	Paracyatholaimus intermedius		X	Uncertainity with current data
Nematoda	Chromadorea	Desmodorida	Desmodoridae	Spirinia parasitifera		X	Reliable according to current available data
Nematoda	Chromadorea	Rhabditida	Cucullanidae	Cucullanus heterodonti		X	Uncertainity with current data
Nematoda	Chromadorea	Rhabditida	Rhabditidae	Litoditis marina		X	Reliable according to current available data
Annelida	Clitellata	Tubificida	Naididae	Paranais litoralis	X		Reliable according to current available data
Arthropoda	Copepoda	Calanoida	Acartiidae	Acartia (Acartiura) clausi	X		Reliable according to current available data
Arthropoda	Copepoda	Calanoida	Aetideidae	Gaetanus minutus		X	Uncertainity with current data
Arthropoda	Copepoda	Calanoida	Calanidae	Calanoides carinatus		X	Reliable according to current available data
Arthropoda	Copepoda	Calanoida	Calanidae	Calanus finmarchicus		X	Uncertainity with current data
Arthropoda	Copepoda	Calanoida	Calanidae	Calanus glacialis		X	Uncertainity with current data
Arthropoda	Copepoda	Calanoida	Candaciidae	Candacia bipinnata		X	Uncertainity with current data
Arthropoda	Copepoda	Calanoida	Centropagidae	Centropages typicus	X	X	Reliable according to current available data
Arthropoda	Copepoda	Calanoida	Centropagidae	Isias clavipes		X	Reliable according to current available data
Arthropoda	Copepoda	Calanoida	Clausocalanidae	Pseudocalanus elongatus	X		Reliable according to current available data
Arthropoda	Copepoda	Calanoida	Metridinidae	Metridia gerlachei		X	Uncertainity with current data
Arthropoda	Copepoda	Calanoida	Metridinidae	Pleuromamma borealis		X	Uncertainity with current data
Arthropoda	Copepoda	Calanoida	Paracalanidae	Paracalanus parvus	X		Reliable according to current available data
Arthropoda	Copepoda	Calanoida	Pontellidae	Anomalocera patersonii		X	Reliable according to current available data
Arthropoda	Copepoda	Calanoida	Pseudodiaptomidae	Pseudodiaptomus marinus*	X	X	Reliable according to current available data (COI and 18S)
Arthropoda	Copepoda	Calanoida	Subeucalanidae	Subeucalanus subtenuis		X	Uncertainity with current data
Arthropoda	Copepoda	Calanoida	Temoridae	Temora discaudata		X	Uncertainity with current data
Arthropoda	Copepoda	Calanoida	Temoridae	Temora longicornis	X	X	Reliable according to current available data
Arthropoda	Copepoda	Calanoida	Temoridae	Temora stylifera	X		Reliable according to current available data
Arthropoda	Copepoda	Cyclopoida	Corycaeidae	Ditrichocorycaeus anglicus	X		Reliable according to current available data
Arthropoda	Copepoda	Cyclopoida	Lichomolgidae	Astericola clausii		X	Reliable according to current available data
Arthropoda	Copepoda	Cyclopoida	Oithonidae	Oithona davisae		X	Reliable according to current available data
Arthropoda	Copepoda	Harpacticoida	Ameiridae	Ameira scotti		X	Reliable according to current available data
Arthropoda	Copepoda	Harpacticoida	Ectinosomatidae	Pseudobradya minor	X		Reliable according to current available data
Arthropoda	Copepoda	Harpacticoida	Harpacticidae	Harpacticus flexus	X		Reliable according to current available data
Arthropoda	Copepoda	Harpacticoida	Harpacticidae	Zaus caeruleus		X	Uncertainity with current data
Arthropoda	Copepoda	Harpacticoida	Tachidiidae	Euterpina acutifrons	X		Reliable according to current available data
Arthropoda	Copepoda	Monstrilloida	Monstrillidae	Caromiobenella helgolandica		X	Reliable according to current available data
Arthropoda	Copepoda	Polyarthra	Canuellidae	Canuella perplexa		X	Reliable according to current available data
Arthropoda	Copepoda	Siphonostomatoida	Caligidae	Caligus brevipedis		X	Uncertainity with current data
Arthropoda	Copepoda	Siphonostomatoida	Caligidae	Caligus uniartus		X	Uncertainity with current data
Arthropoda	Copepoda	Siphonostomatoida	Caligidae	Lepeophtheirus hospitalis		X	Uncertainity with current data
Porifera	Demospongiae	Dictyoceratida	Dysideidae	Lamellodysidea herbacea		X	Uncertainity with current data
Porifera	Demospongiae	Poecilosclerida	Desmoxyidae	Desmoxya pelagiae		X	Uncertainity with current data
Porifera	Demospongiae	Poecilosclerida	Mycalidae	Mycale (Carmia) sanguinea		X	Uncertainity with current data
Porifera	Demospongiae	Suberitida	Halichondriidae	Halichondria (Halichondria) bowerbanki		X	Uncertainity with current data
Porifera	Demospongiae	Suberitida	Halichondriidae	Hymeniacidon perlevis	X		Reliable according to current available data
Echinodermata	Echinoidea	Camarodonta	Parechinidae	Paracentrotus lividus	X		Reliable according to current available data
Echinodermata	Echinoidea	Camarodonta	Parechinidae	Psammechinus miliaris	X		Reliable according to current available data
Echinodermata	Echinoidea	Camarodonta	Strongylocentrotidae	Strongylocentrotus purpuratus		X	Uncertainity with current data
Echinodermata	Echinoidea	Spatangoida	Loveniidae	Echinocardium cordatum	X		Reliable according to current available data
Hemichordata	Enteropneusta	[unassigned] Enteropneusta	Ptychoderidae	Balanoglossus clavigerus	X		Reliable according to current available data
Mollusca	Gastropoda	[unassigned] Caenogastropoda	Cerithiidae	Bittium reticulatum	X		Reliable according to current available data
Mollusca	Gastropoda	[unassigned] Caenogastropoda	Cerithiopsidae	Cerithiopsis petanii	X		Reliable according to current available data
Mollusca	Gastropoda	[unassigned] Caenogastropoda	Planaxidae	Planaxis sulcatus		X	Uncertainity with current data
Mollusca	Gastropoda	Cephalaspidea	Cylichnidae	Cylichna cylindracea		X	Uncertainity with current data
Mollusca	Gastropoda	Cephalaspidea	Haminoeidae	Haminoea orbignyana	X		Reliable according to current available data
Mollusca	Gastropoda	Cephalaspidea	Haminoeidae	Haminoea orteai	X		Reliable according to current available data
Mollusca	Gastropoda	Cephalaspidea	Haminoeidae	Lamprohaminoea cymbalum		X	Uncertainity with current data
Mollusca	Gastropoda	Littorinimorpha	Caecidae	Caecum trachea	X		Reliable according to current available data
Mollusca	Gastropoda	Littorinimorpha	Calyptraeidae	Crepidula fornicata*	X		Reliable according to current available data
Mollusca	Gastropoda	Littorinimorpha	Hydrobiidae	Peringia ulvae	X	X	Reliable according to current available data (COI and 18S)
Mollusca	Gastropoda	Littorinimorpha	Lironobidae	Merelina tokunagai		X	Reliable according to current available data
Mollusca	Gastropoda	Littorinimorpha	Littorinidae	Littorina littorea	X		Reliable according to current available data
Mollusca	Gastropoda	Littorinimorpha	Rissoidae	Alvania beanii	X		Reliable according to current available data
Mollusca	Gastropoda	Littorinimorpha	Rissoidae	Onoba semicostata	X		Reliable according to current available data
Mollusca	Gastropoda	Littorinimorpha	Triviidae	Trivia monacha	X		Reliable according to current available data
Mollusca	Gastropoda	Neogastropoda	Nassariidae	Ilyanassa obsoleta		X	Uncertainity with current data
Mollusca	Gastropoda	Neogastropoda	Nassariidae	Tritia incrassata	X		Reliable according to current available data
Mollusca	Gastropoda	Neogastropoda	Nassariidae	Tritia nitida	X		Reliable according to current available data
Mollusca	Gastropoda	Neogastropoda	Nassariidae	Tritia reticulata	X		Reliable according to current available data
Mollusca	Gastropoda	Nudibranchia	Aeolidiidae	Aeolidia filomenae	X		Reliable according to current available data
Mollusca	Gastropoda	Nudibranchia	Aeolidiidae	Aeolidiella sanguinea	X		Reliable according to current available data
Mollusca	Gastropoda	Nudibranchia	Aeolidiidae	Spurilla neapolitana	X		Reliable according to current available data
Mollusca	Gastropoda	Nudibranchia	Calmidae	Calma gobioophaga	X		Reliable according to current available data
Mollusca	Gastropoda	Nudibranchia	Cuthonidae	Cuthona nana		X	Uncertainity with current data
Mollusca	Gastropoda	Nudibranchia	Discodorididae	Geitodoris heathi		X	Uncertainity with current data
Mollusca	Gastropoda	Nudibranchia	Discodorididae	Jorunna tomentosa		X	Uncertainity with current data
Mollusca	Gastropoda	Nudibranchia	Dotidae	Doto coronata	X		Reliable according to current available data
Mollusca	Gastropoda	Nudibranchia	Dotidae	Doto koenneckeri	X		Reliable according to current available data
Mollusca	Gastropoda	Nudibranchia	Dotidae	Doto millbayana	X		Reliable according to current available data
Mollusca	Gastropoda	Nudibranchia	Dotidae	Doto pinnatifida	X		Reliable according to current available data
Mollusca	Gastropoda	Nudibranchia	Embletoniidae	Embletonia pulchra	X		Reliable according to current available data
Mollusca	Gastropoda	Nudibranchia	Eubranchidae	Amphorina linensis	X		Reliable according to current available data
Mollusca	Gastropoda	Nudibranchia	Eubranchidae	Capellinia doriae	X		Reliable according to current available data
Mollusca	Gastropoda	Nudibranchia	Eubranchidae	Eubranchus exiguus	X		Reliable according to current available data
Mollusca	Gastropoda	Nudibranchia	Facelinidae	Facelina annulicornis	X		Reliable according to current available data
Mollusca	Gastropoda	Nudibranchia	Facelinidae	Facelina bostoniensis	X		Reliable according to current available data
Mollusca	Gastropoda	Nudibranchia	Facelinidae	Favorinus branchialis	X		Reliable according to current available data
Mollusca	Gastropoda	Nudibranchia	Flabellinidae	Edmundsella pedata	X		Reliable according to current available data
Mollusca	Gastropoda	Nudibranchia	Goniodorididae	Ancula gibbosa		X	Reliable according to current available data
Mollusca	Gastropoda	Nudibranchia	Goniodorididae	Goniodoris castanea	X		Reliable according to current available data
Mollusca	Gastropoda	Nudibranchia	Goniodorididae	Goniodoris nodosa	X	X	Reliable according to current available data (COI and 18S)
Mollusca	Gastropoda	Nudibranchia	Hancockiidae	Hancockia uncinata	X		Reliable according to current available data
Mollusca	Gastropoda	Nudibranchia	Onchidorididae	Atalodoris depressa		X	Reliable according to current available data
Mollusca	Gastropoda	Nudibranchia	Onchidorididae	Atalodoris jannae		X	Uncertainity with current data
Mollusca	Gastropoda	Nudibranchia	Polyceridae	Limacia clavigera	X		Reliable according to current available data
Mollusca	Gastropoda	Nudibranchia	Polyceridae	Polycera quadrilineata	X	X	Reliable according to current available data (COI and 18S)
Mollusca	Gastropoda	Nudibranchia	Tergipedidae	Tergipes tergipes	X	X	Reliable according to current available data (COI only)
Mollusca	Gastropoda	Nudibranchia	Trinchesiidae	Catriona aurantia	X		Reliable according to current available data
Mollusca	Gastropoda	Nudibranchia	Trinchesiidae	Rubramoena amoena	X		Reliable according to current available data
Mollusca	Gastropoda	Nudibranchia	Trinchesiidae	Trinchesia caerulea	X	X	Reliable according to current available data (COI only)
Mollusca	Gastropoda	Nudibranchia	Trinchesiidae	Trinchesia cuanensis	X		Reliable according to current available data
Mollusca	Gastropoda	Nudibranchia	Trinchesiidae	Trinchesia foliata	X		Reliable according to current available data
Mollusca	Gastropoda	Siphonariida	Siphonariidae	Siphonaria pectinata	X		Reliable according to current available data
Mollusca	Gastropoda	Trochida	Phasianellidae	Tricolia pullus	X		Reliable according to current available data
Mollusca	Gastropoda	Trochida	Trochidae	Phorcus lineatus	X		Reliable according to current available data
Mollusca	Gastropoda	Trochida	Trochidae	Steromphala pennanti	X		Reliable according to current available data
Mollusca	Gastropoda	Trochida	Trochidae	Steromphala umbilicalis	X		Reliable according to current available data
Mollusca	Gastropoda		Hedylopsidae	Hedylopsis spiculifera	X		Reliable according to current available data
Mollusca	Gastropoda		Hermaeidae	Aplysiopsis minor		X	Uncertainity with current data
Mollusca	Gastropoda		Limapontiidae	Calliopaea bellula		X	Reliable according to current available data
Mollusca	Gastropoda		Limapontiidae	Ercolania felina		X	Reliable according to current available data
Mollusca	Gastropoda		Limapontiidae	Limapontia capitata	X		Reliable according to current available data
Mollusca	Gastropoda		Limapontiidae	Limapontia depressa	X		Reliable according to current available data
Mollusca	Gastropoda		Limapontiidae	Placida cremoniana		X	Reliable according to current available data
Mollusca	Gastropoda		Limapontiidae	Placida dendritica	X		Reliable according to current available data
Mollusca	Gastropoda		Parhedylidae	Microhedyle glandulifera	X	X	Reliable according to current available data (COI only)
Mollusca	Gastropoda		Patellidae	Patella pellucida	X		Reliable according to current available data
Mollusca	Gastropoda		Patellidae	Patella ulyssiponensis	X		Reliable according to current available data
Mollusca	Gastropoda		Patellidae	Patella vulgata	X		Reliable according to current available data
Mollusca	Gastropoda		Plakobranchidae	Bosellia mimetica		X	Uncertainity with current data
Mollusca	Gastropoda		Plakobranchidae	Elysia viridis	X		Reliable according to current available data
Mollusca	Gastropoda		Planorbidae	Biomphalaria glabrata		X	Uncertainity with current data
Mollusca	Gastropoda		Pyramidellidae	Eulimella ventricosa		X	Uncertainity with current data
Mollusca	Gastropoda		Pyramidellidae	Turbonilla lactea		X	Uncertainity with current data
Bryozoa	Gymnolaemata	Cheilostomatida	Candidae	Tricellaria inopinata*	X		Reliable according to current available data
Bryozoa	Gymnolaemata	Cheilostomatida	Electridae	Electra pilosa	X		Reliable according to current available data
Bryozoa	Gymnolaemata	Cheilostomatida	Membraniporidae	Membranipora membranacea	X		Reliable according to current available data
Bryozoa	Gymnolaemata	Cheilostomatida	Scrupariidae	Scruparia chelata		X	Reliable according to current available data
Bryozoa	Gymnolaemata	Ctenostomatida	Alcyonidiidae	Alcyonidium gelatinosum		X	Uncertainity with current data
Nemertea	Hoplonemertea	Monostilifera	Emplectonematidae	Emplectonema gracile	X		Reliable according to current available data
Nemertea	Hoplonemertea	Monostilifera	Oerstediidae	Oerstedia dorsalis	X		Reliable according to current available data
Cnidaria	Hydrozoa	Anthoathecata	Bougainvilliidae	Bougainvillia muscus	X		Reliable according to current available data
Cnidaria	Hydrozoa	Anthoathecata	Cordylophoridae	Cordylophora caspia*		X	Reliable according to current available data
Cnidaria	Hydrozoa	Anthoathecata	Corynidae	Stauridiosarsia gemmifera	X	X	Reliable according to current available data (COI and 18S)
Cnidaria	Hydrozoa	Anthoathecata	Eudendriidae	Eudendrium racemosum		X	Uncertainity with current data
Cnidaria	Hydrozoa	Anthoathecata	Hydractiniidae	Hydractinia echinata	X		Reliable according to current available data
Cnidaria	Hydrozoa	Anthoathecata	Hydractiniidae	Podocoryna exigua		X	Uncertainity with current data
Cnidaria	Hydrozoa	Anthoathecata	Oceaniidae	Turritopsis nutricula		X	Uncertainity with current data
Cnidaria	Hydrozoa	Anthoathecata	Pandeidae	Amphinema dinema	X		Reliable according to current available data
Cnidaria	Hydrozoa	Anthoathecata	Rathkeidae	Lizzia blondina	X	X	Reliable according to current available data (COI only)
Cnidaria	Hydrozoa	Anthoathecata	Tubulariidae	Ectopleura marina		X	Uncertainity with current data
Cnidaria	Hydrozoa	Leptothecata	Aglaopheniidae	Aglaophenia pluma	X		Reliable according to current available data
Cnidaria	Hydrozoa	Leptothecata	Aglaopheniidae	Aglaophenia tubiformis		X	Uncertainity with current data
Cnidaria	Hydrozoa	Leptothecata	Campanulariidae	Campanularia hincksii	X		Reliable according to current available data
Cnidaria	Hydrozoa	Leptothecata	Campanulariidae	Clytia gracilis	X		Reliable according to current available data
Cnidaria	Hydrozoa	Leptothecata	Campanulariidae	Clytia hemisphaerica	X	X	Reliable according to current available data (COI and 18S)
Cnidaria	Hydrozoa	Leptothecata	Campanulariidae	Clytia paulensis	X		Reliable according to current available data
Cnidaria	Hydrozoa	Leptothecata	Campanulariidae	Obelia dichotoma	X	X	Reliable according to current available data (COI and 18S)
Cnidaria	Hydrozoa	Leptothecata	Campanulariidae	Obelia geniculata	X	X	Reliable according to current available data (COI only)
Cnidaria	Hydrozoa	Leptothecata	Campanulariidae	Obelia longissima		X	Uncertainity with current data
Cnidaria	Hydrozoa	Leptothecata	Campanulariidae	Orthopyxis everta		X	Uncertainity with current data
Cnidaria	Hydrozoa	Leptothecata	Campanulariidae	Orthopyxis integra		X	Uncertainity with current data
Cnidaria	Hydrozoa	Leptothecata	Haleciidae	Halecium halecinum		X	Reliable according to current available data
Cnidaria	Hydrozoa	Leptothecata	Plumulariidae	Plumularia setacea	X		Reliable according to current available data
Cnidaria	Hydrozoa	Leptothecata	Plumulariidae	Plumularia strictocarpa		X	Uncertainity with current data
Cnidaria	Hydrozoa	Leptothecata	Sertulariidae	Abietinaria filicula		X	Uncertainity with current data
Cnidaria	Hydrozoa	Leptothecata	Sertulariidae	Salacia desmoides		X	Reliable according to current available data
Arthropoda	Malacostraca	Amphipoda	Caprellidae	Phtisica marina	X		Reliable according to current available data
Arthropoda	Malacostraca	Decapoda	Alpheidae	Athanas nitescens	X		Reliable according to current available data
Arthropoda	Malacostraca	Decapoda	Carcinidae	Carcinus maenas	X	X	Reliable according to current available data (COI only)
Arthropoda	Malacostraca	Decapoda	Crangonidae	Crangon crangon	X		Reliable according to current available data
Arthropoda	Malacostraca	Decapoda	Crangonidae	Philocheras trispinosus	X		Reliable according to current available data
Arthropoda	Malacostraca	Decapoda	Diogenidae	Clibanarius antillensis		X	Uncertainity with current data
Arthropoda	Malacostraca	Decapoda	Grapsidae	Pachygrapsus marmoratus	X		Reliable according to current available data
Arthropoda	Malacostraca	Decapoda	Hippolytidae	Hippolyte prideauxiana	X		Reliable according to current available data
Arthropoda	Malacostraca	Decapoda	Hippolytidae	Hippolyte varians	X		Reliable according to current available data
Arthropoda	Malacostraca	Decapoda	Palaemonidae	Palaemon longirostris	X		Reliable according to current available data
Arthropoda	Malacostraca	Decapoda	Pilumnidae	Pilumnus hirtellus	X		Reliable according to current available data
Arthropoda	Malacostraca	Decapoda	Polybiidae	Liocarcinus marmoreus	X		Reliable according to current available data
Arthropoda	Malacostraca	Decapoda	Polybiidae	Liocarcinus navigator	X		Reliable according to current available data
Arthropoda	Malacostraca	Decapoda	Polybiidae	Necora puber	X		Reliable according to current available data
Arthropoda	Malacostraca	Decapoda	Porcellanidae	Pisidia longicornis	X		Reliable according to current available data
Arthropoda	Malacostraca	Decapoda	Porcellanidae	Porcellana platycheles	X		Reliable according to current available data
Arthropoda	Malacostraca	Decapoda	Processidae	Processa edulis	X		Reliable according to current available data
Arthropoda	Malacostraca	Decapoda	Thoridae	Eualus cranchii	X		Reliable according to current available data
Arthropoda	Malacostraca	Decapoda	Varunidae	Eriocheir sinensis*		X	Uncertainity with current data
Arthropoda	Malacostraca	Mysida	Mysidae	Leptomysis mediterranea		X	Reliable according to current available data
Arthropoda	Malacostraca	Mysida	Mysidae	Neomysis integer	X	X	Reliable according to current available data (COI and 18S)
Arthropoda	Malacostraca	Mysida	Mysidae	Siriella armata		X	Uncertainity with current data
Echinodermata	Ophiuroidea	Amphilepidida	Amphiuridae	Acrocnida brachiata	X		Reliable according to current available data
Echinodermata	Ophiuroidea	Amphilepidida	Amphiuridae	Amphiura filiformis	X		Reliable according to current available data
Echinodermata	Ophiuroidea	Amphilepidida	Ophiotrichidae	Ophiothrix (Ophiothrix) oerstedii		X	Reliable according to current available data
Echinodermata	Ophiuroidea	Amphilepidida	Ophiotrichidae	Ophiothrix fragilis	X		Reliable according to current available data
Echinodermata	Ophiuroidea	Ophiacanthida	Ophiodermatidae	Ophioderma cinereum		X	Uncertainity with current data
Echinodermata	Ophiuroidea	Ophiacanthida	Ophiotomidae	Ophiocomina nigra	X		Reliable according to current available data
Arthropoda	Ostracoda	Podocopida	Cyprididae	Cypridopsis japonica		X	Uncertainity with current data
Arthropoda	Ostracoda	Podocopida	Cyprididae	Cypridopsis vidua	X		Reliable according to current available data
Arthropoda	Ostracoda	Podocopida	Cytheruridae	Hemicytherura kajiyamai		X	Uncertainity with current data
Arthropoda	Ostracoda	Podocopida	Cytheruridae	Semicytherura striata		X	Reliable according to current available data
Arthropoda	Ostracoda	Podocopida	Leptocytheridae	Leptocythere lacertosa		X	Reliable according to current available data
Nemertea	Palaeonemertea	Archinemertea	Cephalotrichidae	Cephalothrix hongkongiensis		X	Uncertainity with current data
Nemertea	Palaeonemertea	Archinemertea	Cephalotrichidae	Cephalothrix rufifrons		X	Reliable according to current available data
Annelida	Polychaeta	Amphinomida	Amphinomidae	Pareurythoe borealis	X		Reliable according to current available data
Annelida	Polychaeta	Amphinomida	Euphrosinidae	Euphrosine foliosa		X	Uncertainity with current data
Annelida	Polychaeta	Eunicida	Lumbrineridae	Ninoe nigripes		X	Uncertainity with current data
Annelida	Polychaeta	Eunicida	Lumbrineridae	Scoletoma zonata		X	Uncertainity with current data
Annelida	Polychaeta	Eunicida	Onuphidae	Diopatra micrura	X		Reliable according to current available data
Annelida	Polychaeta	Phyllodocida	Chrysopetalidae	Bhawania cryptocephala		X	Uncertainity with current data
Annelida	Polychaeta	Phyllodocida	Nephtyidae	Aglaophamus agilis	X		Reliable according to current available data
Annelida	Polychaeta	Phyllodocida	Nephtyidae	Nephtys assimilis	X		Reliable according to current available data
Annelida	Polychaeta	Phyllodocida	Nephtyidae	Nephtys hombergii	X		Reliable according to current available data
Annelida	Polychaeta	Phyllodocida	Nephtyidae	Nephtys incisa		X	Uncertainity with current data
Annelida	Polychaeta	Phyllodocida	Nereididae	Platynereis dumerilii	X	X	Reliable according to current available data (COI only)
Annelida	Polychaeta	Phyllodocida	Phyllodocidae	Eteone longa		X	Reliable according to current available data
Annelida	Polychaeta	Phyllodocida	Phyllodocidae	Eumida arctica		X	Uncertainity with current data
Annelida	Polychaeta	Phyllodocida	Phyllodocidae	Eumida sanguinea		X	Uncertainity with current data
Annelida	Polychaeta	Phyllodocida	Phyllodocidae	Eumida taygete	X		Reliable according to current available data
Annelida	Polychaeta	Phyllodocida	Phyllodocidae	Phyllodoce mucosa	X		Reliable according to current available data
Annelida	Polychaeta	Phyllodocida	Polynoidae	Gastrolepidia clavigera		X	Uncertainity with current data
Annelida	Polychaeta	Phyllodocida	Polynoidae	Harmothoe clavigera	X		Reliable according to current available data
Annelida	Polychaeta	Phyllodocida	Polynoidae	Harmothoe imbricata		X	Uncertainity with current data
Annelida	Polychaeta	Phyllodocida	Polynoidae	Harmothoe impar		X	Reliable according to current available data
Annelida	Polychaeta	Phyllodocida	Polynoidae	Harmothoe mariannae	X		Reliable according to current available data
Annelida	Polychaeta	Phyllodocida	Polynoidae	Lepidonotus sublevis		X	Uncertainity with current data
Annelida	Polychaeta	Phyllodocida	Polynoidae	Polynoe scolopendrina	X		Reliable according to current available data
Annelida	Polychaeta	Phyllodocida	Sigalionidae	Pholoe baltica		X	Uncertainity with current data
Annelida	Polychaeta	Phyllodocida	Sigalionidae	Pholoe inornata	X		Reliable according to current available data
Annelida	Polychaeta	Phyllodocida	Sigalionidae	Pisione puzae	X		Reliable according to current available data
Annelida	Polychaeta	Phyllodocida	Sigalionidae	Pisione remota		X	Uncertainity with current data
Annelida	Polychaeta	Phyllodocida	Sigalionidae	Sigalion spinosus		X	Reliable according to current available data
Annelida	Polychaeta	Phyllodocida	Sigalionidae	Sthenelais boa	X		Reliable according to current available data
Annelida	Polychaeta	Phyllodocida	Tomopteridae	Tomopteris (Johnstonella) helgolandica	X		Reliable according to current available data
Annelida	Polychaeta	Spionida	Poecilochaetidae	Poecilochaetus serpens		X	Reliable according to current available data
Annelida	Polychaeta	Spionida	Spionidae	Aurospio foodbancsia		X	Uncertainity with current data
Annelida	Polychaeta	Spionida	Spionidae	Malacoceros fuliginosus		X	Reliable according to current available data
Annelida	Polychaeta	Spionida	Spionidae	Pseudopolydora paucibranchiata*	X		Reliable according to current available data
Annelida	Polychaeta	Spionida	Spionidae	Spiophanes bombyx	X		Reliable according to current available data
Annelida	Polychaeta	Terebellida	Pectinariidae	Amphictene auricoma	X		Reliable according to current available data
Annelida	Polychaeta	Terebellida	Pectinariidae	Lagis koreni	X	X	Reliable according to current available data (COI only)
Annelida	Polychaeta	Terebellida	Terebellidae	Lanice conchilega	X		Reliable according to current available data
Annelida	Polychaeta	Terebellida	Terebellidae	Nicolea uspiana		X	Uncertainity with current data
Annelida	Polychaeta		Arenicolidae	Abarenicola pacifica		X	Uncertainity with current data
Annelida	Polychaeta		Capitellidae	Capitella capitata	X		Reliable according to current available data
Annelida	Polychaeta		Capitellidae	Capitella teleta		X	Uncertainity with current data
Annelida	Polychaeta		Magelonidae	Magelona johnstoni	X		Reliable according to current available data
Annelida	Polychaeta		Magelonidae	Magelona mirabilis	X	X	Reliable according to current available data (COI and 18S)
Annelida	Polychaeta		Orbiniidae	Orbinia latreillii	X		Reliable according to current available data
Annelida	Polychaeta		Oweniidae	Owenia fusiformis	X		Reliable according to current available data
Annelida	Polychaeta		Polygordiidae	Polygordius appendiculatus	X		Reliable according to current available data
Annelida	Polychaeta		Protodrilidae	Lindrilus rubropharyngeus		X	Reliable according to current available data
Annelida	Polychaeta		Sabellariidae	Gunnarea gaimardi		X	Uncertainity with current data
Annelida	Polychaeta		Sabellariidae	Sabellaria spinulosa	X		Reliable according to current available data
Mollusca	Polyplacophora	Chitonida	Acanthochitonidae	Acanthochitona crinita	X		Reliable according to current available data
Arthropoda	Pycnogonida	Pantopoda	Ammotheidae	Achelia echinata		X	Uncertainity with current data
Arthropoda	Pycnogonida	Pantopoda	Ammotheidae	Ammothella tuberculata		X	Uncertainity with current data
Arthropoda	Pycnogonida	Pantopoda	Phoxichilidiidae	Anoplodactylus erectus		X	Uncertainity with current data
Chaetognatha	Sagittoidea	Aphragmophora	Sagittidae	Parasagitta friderici		X	Uncertainity with current data
Chordata	Teleostei	Acanthuriformes	Chaetodontidae	Heniochus acuminatus	X		Reliable according to current available data
Chordata	Teleostei	Blenniiformes	Blenniidae	Lipophrys pholis	X		Reliable according to current available data
Chordata	Teleostei	Blenniiformes	Tripterygiidae	Tripterygion delaisi		X	Uncertainity with current data
Chordata	Teleostei	Callionymiformes	Callionymidae	Callionymus lyra	X		Reliable according to current available data
Chordata	Teleostei	Clupeiformes	Clupeidae	Alosa alosa		X	Uncertainity with current data
Chordata	Teleostei	Cyprinodontiformes	Cyprinodontidae	Cyprinodon variegatus		X	Uncertainity with current data
Chordata	Teleostei	Eupercaria incertae sedis	Labridae	Ctenolabrus rupestris	X		Reliable according to current available data
Chordata	Teleostei	Eupercaria incertae sedis	Moronidae	Dicentrarchus labrax		X	Uncertainity with current data
Chordata	Teleostei	Gadiformes	Gadidae	Gadus morhua		X	Uncertainity with current data
Chordata	Teleostei	Gadiformes	Gadidae	Raniceps raninus	X		Reliable according to current available data
Chordata	Teleostei	Gadiformes	Gadidae	Trisopterus luscus	X		Reliable according to current available data
Chordata	Teleostei	Gobiiformes	Eleotridae	Mogurnda adspersa		X	Uncertainity with current data
Chordata	Teleostei	Gobiiformes	Gobiidae	Aphia minuta	X		Reliable according to current available data
Chordata	Teleostei	Gobiiformes	Gobiidae	Crystallogobius linearis	X		Reliable according to current available data
Chordata	Teleostei	Gobiiformes	Gobiidae	Gobius niger	X		Reliable according to current available data
Chordata	Teleostei	Gobiiformes	Gobiidae	Pomatoschistus flavescens	X		Reliable according to current available data
Chordata	Teleostei	Gobiiformes	Gobiidae	Pomatoschistus microps	X		Reliable according to current available data
Chordata	Teleostei	Gobiiformes	Gobiidae	Pomatoschistus pictus	X		Reliable according to current available data
Chordata	Teleostei	Pleuronectiformes	Pleuronectidae	Pleuronichthys cornutus		X	Uncertainity with current data
Chordata	Teleostei	Scombriformes	Scombridae	Scomber scombrus	X		Reliable according to current available data
Arthropoda	Thecostraca	Balanomorpha	Austrobalanidae	Austrobalanus imperator		X	Uncertainity with current data
Arthropoda	Thecostraca	Balanomorpha	Balanidae	Amphibalanus eburneus*	X		Reliable according to current available data
Arthropoda	Thecostraca	Balanomorpha	Balanidae	Amphibalanus improvisus*	X		Reliable according to current available data
Arthropoda	Thecostraca	Balanomorpha	Balanidae	Balanus trigonus*	X		Reliable according to current available data
Arthropoda	Thecostraca	Balanomorpha	Chthamalidae	Chthamalus montagui	X		Reliable according to current available data
Arthropoda	Thecostraca	Balanomorpha	Chthamalidae	Chthamalus stellatus		X	Uncertainity with current data
Arthropoda	Thecostraca	Balanomorpha	Elminiidae	Austrominius modestus*	X		Reliable according to current available data
Arthropoda	Thecostraca	Lithoglyptida	Lithoglyptidae	Auritoglyptes bicornis		X	Uncertainity with current data
Arthropoda	Thecostraca	Pollicipedomorpha	Pollicipedidae	Pollicipes pollicipes		X	Uncertainity with current data
Arthropoda	Thecostraca	Verrucomorpha	Verrucidae	Verruca spengleri		X	Uncertainity with current data
Arthropoda	Thecostraca	Verrucomorpha	Verrucidae	Verruca stroemia	X		Reliable according to current available data
Arthropoda	Thecostraca		Sacculinidae	Sacculina carcini	X	X	Reliable according to current available data (COI and 18S)
Platyhelminthes		Polycladida	Euryleptidae	Prostheceraeus vittatus		X	Uncertainity with current data
Platyhelminthes		Polycladida	Notoplanidae	Notoplana australis		X	Uncertainity with current data
Platyhelminthes		Polycladida	Planoceridae	Paraplanocera oligoglena		X	Uncertainity with current data
Platyhelminthes		Prolecithophora	Plagiostomidae	Vorticeros auriculatum		X	Reliable according to current available data
Platyhelminthes		Prolecithophora	Protomonotresidae	Protomonotresis centrophora		X	Reliable according to current available data
Platyhelminthes		Rhabdocoela	Placorhynchidae	Placorhynchus dimorphis		X	Reliable according to current available data
Platyhelminthes		Rhabdocoela	Placorhynchidae	Placorhynchus octaculeatus		X	Reliable according to current available data
Platyhelminthes		Rhabdocoela	Provorticidae	Provortex balticus		X	Uncertainity with current data
Annelida		Sipuncula	Golfingiidae	Nephasoma (Nephasoma) rimicola	X		Reliable according to current available data
Annelida		Sipuncula	Phascolosomatidae	Phascolosoma (Phascolosoma) granulatum		X	Uncertainity with current data
Entoprocta			Loxosomatidae	Loxosomella stomatophora		X	Uncertainity with current data
Phoronida			Phoronidae	Phoronis emigi		X	Uncertainity with current data

## Sheet: Figure S1
Figure S1: Species-level (y axis) and sampling events (x axis) clustering associated with a heatmap color coded based on the number of replicates where each taxa was detected on each sampling event (0-3, with 0 indicating absence in all replicates and 3 presence in all replicates). Both dendrograms are color coded based on each taxa phylum for the y axis, and based on the sampled seasons for the …
